# Supplementary material for: Initial non-operative management of uncomplicated appendicitis in children: a protocol for a multicentre randomised controlled trial (APAC trial)
Source: PubMed Central journal article supplement — BMJ Open. 2017 Nov 15;7(11):e018145. doi: 10.1136/bmjopen-2017-018145 (PMC5695479; doi:10.1136/bmjopen-2017-018145), 2017-11-15
Supplement: bmjopen-2017-018145.draft_revisions.pdf [file bmjopen-2017-018145.draft_revisions.pdf]

# BMJ Open

BMJ Open is committed to open peer review. As part of this commitment we make the peer review history of every article we publish publicly available.

When an article is published we post the peer reviewers' comments and the authors' responses online. We also post the versions of the paper that were used during peer review. These are the versions that the peer review comments apply to.

The versions of the paper that follow are the versions that were submitted during the peer review process. They are not the versions of record or the final published versions. They should not be cited or distributed as the published version of this manuscript.

BMJ Open is an open access journal and the full, final, typeset and author-corrected version of record of the manuscript is available on our site with no access controls, subscription charges or pay-per-view fees (<http://bmjopen.bmj.com>).

If you have any questions on BMJ Open's open peer review process please email [editorial.bmjopen@bmj.com](mailto:editorial.bmjopen@bmj.com)

# BMJ Open

## Initial non-operative management of uncomplicated appendicitis in children: A protocol for a multicenter randomized controlled trial (APAC trial)

|                                 |                                                                                                                                                                                                                                                                                                                                                                                                                                                                                                                                                                                                                                                                                                                                                                                                                                                     |
|---------------------------------|-----------------------------------------------------------------------------------------------------------------------------------------------------------------------------------------------------------------------------------------------------------------------------------------------------------------------------------------------------------------------------------------------------------------------------------------------------------------------------------------------------------------------------------------------------------------------------------------------------------------------------------------------------------------------------------------------------------------------------------------------------------------------------------------------------------------------------------------------------|
| Journal:                        | <i>BMJ Open</i>                                                                                                                                                                                                                                                                                                                                                                                                                                                                                                                                                                                                                                                                                                                                                                                                                                     |
| Manuscript ID                   | bmjopen-2017-018145                                                                                                                                                                                                                                                                                                                                                                                                                                                                                                                                                                                                                                                                                                                                                                                                                                 |
| Article Type:                   | Protocol                                                                                                                                                                                                                                                                                                                                                                                                                                                                                                                                                                                                                                                                                                                                                                                                                                            |
| Date Submitted by the Author:   | 08-Jun-2017                                                                                                                                                                                                                                                                                                                                                                                                                                                                                                                                                                                                                                                                                                                                                                                                                                         |
| Complete List of Authors:       | Knaapen, Max; Pediatric Surgical Center of Amsterdam; Emma Children's Hospital AMC and VU University Medical Center<br>van der Lee, Johanna H.; AMC, Pediatric Clinical Research Office<br>Bakx, Roel; Pediatric Surgical Center of Amsterdam; Emma Children's Hospital AMC and VU University Medical Center<br>The, Sarah-May; Pediatric Surgical Center of Amsterdam; Emma Children's Hospital AMC and VU University Medical Center<br>Van Heurn, Ernst; Pediatric Surgical Center of Amsterdam; Emma Children's Hospital AMC and VU University Medical Center<br>Heij, Hugo; Pediatric Surgical Center of Amsterdam; Emma Children's Hospital AMC and VU University Medical Center<br>Gorter, Ramon; Pediatric Surgical Center of Amsterdam; Emma Children's Hospital AMC and VU University Medical Center<br>. , APAC collaborative study group |
| <b>Primary Subject Heading</b>: | Surgery                                                                                                                                                                                                                                                                                                                                                                                                                                                                                                                                                                                                                                                                                                                                                                                                                                             |
| Secondary Subject Heading:      | Paediatrics                                                                                                                                                                                                                                                                                                                                                                                                                                                                                                                                                                                                                                                                                                                                                                                                                                         |
| Keywords:                       | PAEDIATRICS, Paediatric gastroenterology < PAEDIATRICS, PAEDIATRIC SURGERY, Paediatric colorectal surgery < PAEDIATRIC SURGERY, SURGERY                                                                                                                                                                                                                                                                                                                                                                                                                                                                                                                                                                                                                                                                                                             |
|                                 |                                                                                                                                                                                                                                                                                                                                                                                                                                                                                                                                                                                                                                                                                                                                                                                                                                                     |

SCHOLARONE™  
Manuscripts

1  
2  
3 **Initial non-operative management of uncomplicated appendicitis in children:**  
4 **A protocol for a multicenter randomized controlled trial (APAC trial)**  
5

6  
7 Knaapen M MD<sup>1</sup>, van der Lee JH MD, PhD<sup>2</sup>, Bakx R MD, PhD<sup>1</sup>, The SML<sup>1</sup>, van Heurn LWE MD, PhD<sup>1</sup>,  
8 Heij HA MD, PhD<sup>1</sup>, Gorter RR MD, PhD<sup>1</sup>, APAC collaborative study group  
9

- 10 1. Pediatric Surgical Center of Amsterdam; Emma Children's Hospital AMC and VU University  
11 Medical Center, Amsterdam, The Netherlands  
12 2. Pediatric Clinical Research Office, Academic Medical Center, Amsterdam, The Netherlands  
13

14  
15 Address correspondence to M. Knaapen, MD

16 Address: Pediatric Surgical Center of Amsterdam; Emma Children's Hospital AMC,  
17 P.O. Box 22660, 1100 DD, Amsterdam, The Netherlands

18 Email: M.Knaapen@AMC.UvA.nl

19 Telephone: +31-20-444-2424

20 Fax: +31-20-444-2135  
21

22  
23 Funding statement: This work is supported by The Netherlands Organization for Health Research and  
24 Development (ZonMw) grantnumber 843002708.  
25

26 Competing interests statement: None to declare  
27  
28  
29  
30  
31  
32  
33  
34  
35  
36  
37  
38  
39  
40  
41  
42  
43  
44  
45  
46  
47  
48  
49  
50  
51  
52  
53  
54  
55  
56  
57  
58  
59  
60

## Abstract

### Introduction

Based on epidemiological, immunological and pathology data the idea that appendicitis is not necessarily a progressive disease is gaining ground. Two types are distinguished: simple and complicated appendicitis. Non-operative treatment (NOT) of children with simple appendicitis has been investigated in several small studies. So far it is deemed safe. However, its effectiveness and effect on quality of life (QoL) has yet to be established in a adequately powered randomized trial. In this article we provide the study protocol for the APAC trial.

### Methods and analysis

This multicenter, unblinded, non-inferiority, randomized controlled trial, randomizes children aged 7 to 17 years with imaging-confirmed simple appendicitis between appendectomy and NOT. Patients are recruited in 15 hospitals. The intended sample size, based on the primary outcome, rate of complications, is 334 patients.

NOT consists of IV antibiotics for 48-72 hours, daily blood tests, and ultrasound follow-up. If the patient meets the pre-defined discharge criteria, antibiotic treatment is continued orally at home. Primary outcome is the rate of complications at one year follow-up. An independent adjudication committee will assess all complications and their relation to the allocated treatment. Secondary outcomes include, but are not limited to, delayed appendectomies, QoL, pain, direct and indirect costs.

The primary outcome will be analysed both according to the intention-to-treat and to the per-protocol principle, and is presented with a one-sided 97.5% confidence interval. We will use multiple logistic and linear regression for binary and continuous outcomes, respectively, to adjust for stratification factors.

### Ethics and dissemination.

The protocol has been approved by the Medical Ethics Review Committee of the Academic Medical Center, Amsterdam. Data monitoring is performed by an independent institute and a Data Safety Monitoring Board has been assigned. Results will be presented in peer-reviewed academic journals and at (international) conferences.

### Registration details

NCT02848820; NTR5977

## Strengths and limitations of this study

1. Meticulous selection of children with uncomplicated appendicitis using strict (evidence based) criteria, including ultrasonography.
2. Elaborate follow-up on patient, parent, hospital and economic-level.
3. An independent adjudication committee assessing all complications and their relation to the allocated treatment.
4. The non-inferiority design does not allow for a superiority comparison of the rate of complications.

## Introduction

Appendicitis is a common gastro-intestinal disease with a lifetime incidence of 7-9%(1,2). Based on the assumption that urgent removal of the appendix is necessary to avoid progressive inflammation with subsequent necrosis and perforation of the appendix, emergency appendectomy has been the standard of care since 1889. However, based on epidemiological, immunological and pathology data, several experts have stated(3–6) that appendicitis is not necessarily a progressive disease. Rather, they endorse the idea that two types of appendicitis exist: simple or uncomplicated appendicitis and complicated appendicitis. Over the years, there has been a shift towards non-operative treatment strategies for diseases which were historically treated surgically, for instance, stomach ulcers and uncomplicated diverticulitis. More recently, non-operative treatment (NOT) of acute uncomplicated appendicitis (AUA) has become the subject of investigation. This strategy consists of initial treatment with intravenous antibiotics and reserves appendectomy for non-responders and those with recurrent appendicitis.

Several randomized controlled trials (RCTs) looked at the non-operative treatment of AUA in the adult population. Results, however, vary. Most trials conclude that NOT is safe, but the reported reduction of complications varies from no significant differences(7,8) to up to 39% reduction(9). Recurrent symptoms resulting in delayed appendectomy occur in roughly 1 in 4 patients(7–9). These numbers are interpreted in different ways, as is illustrated by the conclusions of three recent systematic reviews, which range from indicating NOT as the preferred treatment(9) to rejecting it as a routine treatment due to insufficient knowledge about its impact on quality of life (QoL)(8).

One third of all cases of appendicitis occur under the age of 20 years. The relevance of NOT in children might even be greater than in the adult population, since in children aged 5 to 18 years 68-90% of all cases of appendicitis are uncomplicated(2,10), which is high compared to the adult population. However, data in the pediatric population on the outcome of NOT for uncomplicated appendicitis is scarce and consists mainly of uncontrolled studies with small patient numbers. Recently a systematic review was published, including 10 studies (1 pilot RCT, 6 prospective cohorts and 3 retrospective cohorts) with a total of 413 children treated with NOT(11). Overall complications were reported in 5 of the 6 comparative studies. One out of 175 (0.6%) patients in the NOT group suffered complications vs. 9/239 (3.8%) patients in the primary appendectomy group. Follow-up ranged from 8 weeks to 4 years, with 82% of the NOT patients not having undergone appendectomy at follow-up completion. Recurrent appendicitis occurred in 68/396 (17%) patients; this included 19 children who were treated with a second course of antibiotics.

The evidence regarding the outcome of NOT in the pediatric population is far from sufficient. As of today, apart from the trial described in this article, four large RCTs(12–15) are recruiting children for

1  
2  
3 a comparison of primary appendectomy with NOT. In the Antibiotics versus Primary Appendectomy  
4 in Children (APAC) trial we aim to evaluate the effectiveness of the initial NOT strategy (reserving  
5 appendectomy for those not responding or with recurrent disease) compared to immediate  
6 appendectomy in terms of complications, health-related QoL and costs in children aged 7 to 17 years  
7 with AUA.  
8  
9

## 10 **Methods and analysis**

### 11 ***Study design***

12 The APAC trial is a multicenter non-inferiority randomized controlled trial. Blinding was not deemed  
13 feasible. The protocol was drafted in accordance with the SPIRIT statements (Standard Protocol  
14 Items: Recommendations for Interventional Trials)(16). This trial was registered at clinicaltrials.gov  
15 (NCT02848820) and the Dutch Trial Registry (NTR5977) prior to the start of inclusion.  
16  
17

### 18 ***Patient selection***

19 Eligible for inclusion are children 7 to 17 years old of both sexes, in whom a imaging-confirmed acute  
20 uncomplicated appendicitis is diagnosed in the emergency department of one of the participating  
21 hospitals.  
22  
23

### 24 ***Inclusion criteria***

25 Definition of AUA is based upon the following criteria.  
26

- 27 • Clinical & biochemical criteria:
  - 28 - Localized tenderness in the right iliac fossa region
  - 29 - Normal/hyperactive bowel sounds
  - 30 - No guarding or palpable mass
  - 31 - Biochemical signs of infection:
    - 32 - Elevated white blood cell count (WBC)
    - 33 - Elevated C-reactive protein (CRP)
- 34 • Ultrasound criteria to confirm the diagnosis of AUA:
  - 35 - A non-compressible, painful appendix with an outer diameter > 6 mm
  - 36 - Secondary signs of inflammation, i.e. infiltration of the surrounding fat
  - 37 - Hyperemia within the appendiceal wall

38  
39  
40  
41  
42  
43 In case the ultrasound is inconclusive, additional imaging (MRI or CAT-scan) may be obtained.  
44  
45

### 46 ***Exclusion criteria***

- 47 - Generalized peritonitis or sepsis (as defined by the international pediatric sepsis  
48 consensus conference(17))
- 49 - Findings on imaging indicative of complex appendicitis:
  - 50 - significant and/or unclear free fluid
  - 51 - signs of perforation
  - 52 - signs of intra-abdominal abscess or phlegmone
- 53 - Faecolith, which might be associated with a higher risk of NOT failure(18–20)
- 54 - Serious co-morbidity such as cardiac or pulmonary disease with significant  
55 hemodynamic consequences, immunodeficiency, malignancy or sickle cell disease  
56  
57  
58  
59  
60

- A history of non-operatively treated appendicitis
- Suspicion of an underlying malignancy or inflammatory bowel disease
- Documented type 1 allergy to the antibiotics used
- A complex appendicitis risk score indicative of complex appendicitis

#### *Complex appendicitis risk score*

A pediatric scoring system is used(21) predicting the risk of having complex appendicitis based upon five pre-operative variables; abdominal guarding, signs of complex appendicitis on ultrasound, CRP level, temperature and days of abdominal pain. In an independent validation in a second pediatric cohort a score below 4 had a negative predictive value of 98% (95% confidence interval(CI) 88-100). Children presenting with a score of 4 or higher will be excluded from this study because of the risk of having complicated appendicitis.

#### **Randomization**

After written informed consent from parents and child (assent from children under the age of 12) patients are randomized using the web-based randomization program Castor Electronic Data Capture version 4.10(22), stratified by center. A variable block algorithm is used to ensure concealment of allocation.

#### **Sample size calculation**

A non-inferiority design is used based upon evidence in the literature that NOT has potential secondary advantages. It would be sufficient when this trial demonstrates that the outcome in terms of complications is not worse in the NOT group as compared to the immediate appendectomy group. The overall frequency of post-operative complications after appendectomy is approximately 10%, meaning that 90% will be successfully treated without complications. If the difference in complication rate is less than 5%, non-inferiority is assumed. Using a 1-sided alpha of 2.5%, circa 150 patients per group are needed to achieve 90% power for the exclusion of a difference in favor of the usual care group of more than 5%. Although in our pilot study(23) the drop-out rate in one year was only 2%, we take into account a drop-out rate of 10%. Therefore, the number of patients to be included is 334.

#### **Study setting and feasibility**

Eligible patients are recruited in 15 hospitals across the Netherlands. This selection consists of both academic and large teaching hospitals. Inclusion started in January 2017. Based on data supplied by the participating hospitals approximately 225 children per year will meet the inclusion criteria. In our pilot study 57% of eligible patients participated. Taking these numbers into account we expect to include 128 patients per year. We therefore expect to complete inclusion within 32 months. All of the clinical, biochemical and imaging assessments are part of the standard work-up for children suspected of having appendicitis in the Netherlands, as described in the Dutch national guideline(24).

#### **Interventions**

##### *Non-operative management*

Antibiotic treatment consists of 48 hours of intravenous (IV) amoxicillin/clavulanic acid 25/2.5 mg/kg 6-hourly (maximum dose: 6000/600 mg per day) and gentamicin (7 mg/kg once daily). When the patient meets the pre-defined discharge criteria after 48 hours (Table 1) he/she is discharged with

oral antibiotics. If not, IV antibiotics are continued with a maximum total duration of 72 hours. Oral treatment consists of amoxicillin/clavulanic acid 50/12.5 mg/kg in three daily doses (maximum dose: 1500/375 mg per day). Total duration of antibiotic treatment is 7 days.

| <b>Pre-defined discharge criteria (equal for both interventions)</b> |                                                                |
|----------------------------------------------------------------------|----------------------------------------------------------------|
| 1.                                                                   | Body temperature < 38.0 degrees Celsius                        |
| 2.                                                                   | NRS <4                                                         |
| 3.                                                                   | Adequate oral intake                                           |
| 4.                                                                   | Able to mobilize                                               |
| 5.                                                                   | Consent of parents for discharge                               |
| <b>Pre-defined discharge only for non-operative management</b>       |                                                                |
| 6.                                                                   | Decreased leukocytosis                                         |
| 7.                                                                   | Decreased C-reactive protein                                   |
| 8.                                                                   | No signs of complex appendicitis on 2 <sup>nd</sup> ultrasound |

**Table 1. Pre-defined discharge criteria. All criteria have to be met to allow patient to be discharged**

To optimize early detection of NOT failure, WBC and CRP are measured every 24 hours during the time of administration of IV antibiotics. After 48 hours the abdominal ultrasound is repeated to check for signs of complicated appendicitis. Pre-defined criteria of clinical deterioration (Figure 1) define the indication for appendectomy.

A physician reassesses the patient twice daily. Vital parameters including Numeric Rating Scale (NRS) pain scores are repeated every 6 hours. IV fluid administration is protocolized and weight adjusted, with no oral intake during the first 12 hours. Pain medication is prescribed according to the national guideline(25).



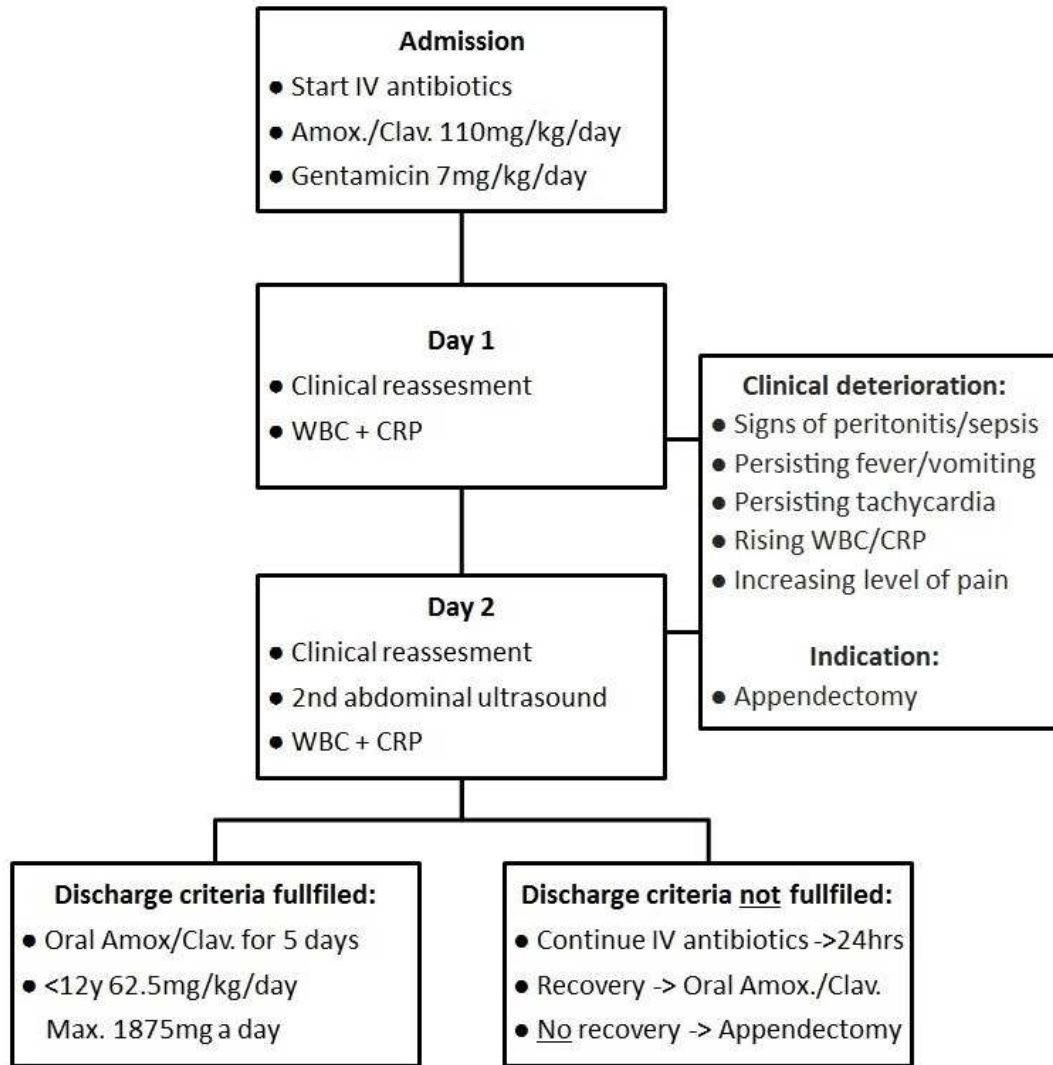

Figure 1. Flowchart non-operative management

#### *Operative management*

IV fluids and pain medication is administered according to the same protocol as the NOT group. Antibiotic prophylaxis, operative approach and post-operative care are all according to local protocol. Post-operative antibiotics are only warranted in the event of an unexpected complex appendicitis. Discharge is allowed when the predefined discharge criteria have been met (Table 1).

## Outcome and statistical analysis

### *Primary outcome*

The primary outcome is defined as the complication rate at one year follow-up. An independent adjudication committee will review all complications and adverse events to assess their relation to the allocated treatment. Delayed appendectomy is not considered a complication, as we consider appendectomy necessary in patients who do not respond to initial non-operative management. However, we do report the rate of delayed appendectomies as a secondary outcome. Complications are defined as, but not limited to:

- Allergic reaction to antibiotics
- Need for surgical or radiological intervention other than appendectomy but related to appendicitis
- Re-admission for an indication other than recurrent appendicitis but related to the allocated treatment
- Complications associated with appendectomy:
  - Surgical site infection
  - Intra-abdominal abscess
  - Stump leakage/stump appendicitis
  - Secondary bowel obstruction, for instance as a result of adhesions
  - Anesthesia related complications, such as pneumonia
  - Hernia cicatricialis

### **Secondary outcomes**

To evaluate the secondary endpoints follow-up will take place at 7 days, 4 weeks, 6 months and 1 year after randomization.

- Appendectomy related endpoints
  - Percentage of patients not having to undergo appendectomy
  - Percentage of patients with a missed diagnosis of complex appendicitis
  - Percentage of patients having to undergo appendectomy during initial antibiotic course
  - Patients with recurrent appendicitis within 1 year (histopathologically confirmed)
  - Percentage of patients undergoing interval appendectomy (histopathologically no sign of recurrent appendicitis)
- Patient related endpoints
  - Level of pain: assessed with by the NRS and total usage of pain medication on day 7
  - Health-related Quality of Life: assessed with the Child Health Questionnaire-Child Form 87 (CHQ-CF87)(26), the European Quality of Life-5Dimensions-Youth questionnaire (EQ-5D-Y) (child perspective) and European Quality of life-5Dimensions-Proxy questionnaire (EQ-5D-Proxy) (parent perspective)(27)
  - Patient satisfaction assessed with the NET promotor score and the validated Patient Satisfaction Questionnaire (PSQ-18)(28)
  - Number of days absent from school, social or sport events (patient-level)
  - Number of days absent from work (parent-level)
  - Total number of extra visits to the outpatient clinic, general practitioner's office or emergency department for abdominal pain
  - Total length of hospital stay during the follow-up period for complications related to the allocated treatment
- Cost related endpoints
  - Non-medical and indirect costs at one year follow-up: using the Medical Consumption Questionnaire (iMCQ)(29) and the Productivity Cost Questionnaire (iPCQ)(30) adapted for use in children and parents

- 1  
2  
3 - Actual health care costs: variables gathered are, but not are limited to, number of follow-  
4 up out-patient clinic visits, number of general practitioner visits, number of emergency  
5 department visits and actual in-hospital generated costs  
6  
7

### 8 ***Data analysis plan***

9 The primary analysis will be done according to the intention-to-treat (ITT) principle. A per-protocol  
10 analysis will be performed as well to prevent unjust rejection of the null hypothesis, which is a risk in  
11 non-inferiority research(31). We will use multiple logistic and linear regression analyses for binary  
12 and continuous outcomes, respectively, to adjust for stratification factors. Differences in proportions,  
13 numbers needed to treat and absolute and relative differences in continuous outcomes will be  
14 presented with the corresponding 95% CI, except for the percentage of patients with complications  
15 within one year (primary outcome), for which a one-sided 97.5% CI limit will be given in accordance  
16 with the non-inferiority design. In a secondary analysis the information recorded during the initial  
17 hospital stay will be analyzed using multiple logistic regression analysis in order to identify potential  
18 predictive variables for NOT failure. Statistical analyses will be performed using IBM SPSS Statistics  
19 Version 22.0 or higher (IBM Corp. released 2013. Armonk, NY).  
20  
21  
22  
23

### 24 **Ethics and dissemination.**

#### 25 ***Data collection and confidentiality***

26 All data is handled confidentially and access is strictly limited in accordance with the Dutch Personal  
27 Data Protection Act. All participants are assigned a unique study code, which is not based on the  
28 patient initials or birth date. The master sheet only contains the study code and patient identification  
29 information. Data is gathered through clinical observations, outpatient clinic visits, follow-up phone  
30 calls and online questionnaires. All data is collected via Castor Electronic Data Capture(22), a web-  
31 based electronic case record form, which is built, maintained and has an audit trail all according to  
32 Good Clinical Practice guidelines. All data will be stored for a period of at least 15 years.  
33  
34  
35  
36

#### 37 ***Monitoring and safety***

38 Reliable high quality data is deemed of the utmost importance. The Clinical Research Bureau of the  
39 VU University Medical Centre will provide external monitoring, with monitoring visits of each  
40 participating center at least once a year.

41 The accredited Medical Ethics Review Committee of the Academic Medical Center, Amsterdam  
42 (MERC AMC) will be informed annually. All (serious) adverse events, suspected unexpected serious  
43 adverse reactions (SUSAR) and any other significant problems are reported to the MERC using an  
44 online submission system. To further assure the safety of participants an independent Data Safety  
45 Monitoring Board (DSMB) is installed, consisting of a surgeon, a pediatrician and a statistician. They  
46 receive an overview of the primary outcome six-monthly, as well as serious adverse events (SAEs),  
47 SUSARs and the number of patients having to undergo a delayed appendectomy. An interim analysis  
48 for efficacy will not be performed. If a serious concern arises for the safety of the patients in the trial,  
49 the DSMB can recommend early termination of the study. These agreements have been documented  
50 in a DSMB charter.  
51  
52  
53  
54  
55  
56  
57  
58  
59  
60

### **Ethics**

The trial will be conducted in compliance with the current version of the Declaration of Helsinki, the ICH Good Clinical Practice guidelines E6(R1) and in accordance with the Dutch Medical Research Involving Human Subjects Act (WMO). The study protocol has been approved by the MREC AMC.

### **Withdrawal**

Subjects can withdraw from the study without explanation at any time. They will be asked their reason for withdrawal, and they will be asked for permission to use their data. In case of withdrawal the patient will be treated according to the national protocol, which would be an appendectomy. However, the surgeon in charge of care can decide otherwise in agreement with the patient and his or her family. Patients can also be withdrawn by the surgeon or the investigator for urgent medical reasons.

### **Dissemination plan**

Dispersion of the trial results will be accomplished by publication in an international peer-reviewed scientific journal and by presentations at (international) conferences. When the results of the trial warrant changes in the standard treatment guidelines of simple appendicitis, we reckon that the widespread execution of the trial in centers throughout the Netherlands will aid in its implementation.

### **Implementation study**

To ensure optimal implementation a problem analysis will be conducted parallel to this RCT, investigating the promoting and obstructing determinants of implementation from patients', surgeons', organizational and social-political perspective. This qualitative study will include structured interviews with patients, parents, professionals and other stakeholders.

## **Discussion**

### ***Strengths and limitations of this study***

This trial only includes patients with imaging-confirmed appendicitis, thus reducing the risk of including patients with other diagnoses, or those with a non-inflamed appendix. Since the implementation of a guideline in the Netherlands promoting pre-operative imaging, the pre-operative finding of non-inflamed appendices was reduced to 3.3%(32), which is low compared to for example the UK, where it is 20.6%(33). We postulate that our use of elaborate and, where possible, evidence-based patient selection methods enhances the chance of successful non-operative management. To warrant the safety of patients undergoing NOT, this protocol dictates systematic and frequent evaluation (by clinical assessment, laboratory tests and imaging studies). We expect this will identify patients not responding to the antibiotic treatment at an early stage.

The non-inferiority design does not allow for a superiority comparison for the rate of complications. The design choice was based on the argument that both treatment strategies are 100% effective in treating appendicitis, because when antibiotic treatment is not successful and when recurrent appendicitis occurs, appendectomy is performed. We postulate that the non-operatively treated patients who do not require appendectomy will have a reduction in costs, better quality of life and the avoidance of the complications associated with appendectomy. Essential for the possible acceptance of this new strategy is that it is not inferior when it comes to the risk of complications. To

1  
2  
3 determine the severity of possible complications and their relation with the allocated treatment we  
4 consider the support of an independent adjudication committee a great asset.  
5

6 The inclusion and exclusion criteria of this trial are mostly based on data that allow for distinguishing  
7 complex from uncomplicated appendicitis. Criteria that predict the risk of NOT failure would be more  
8 adequate. However, more data and more experience are needed to be able to develop such criteria.  
9 Data from the APAC trial will also be used to analyze predictors of failure.  
10

#### 11 *Complicated appendicitis*

12 Reluctance of some surgeons towards NOT might be explained by the fear of missing complicated  
13 appendicitis and delaying appropriate treatment. In 4.5-6.5% of the adult population treated with  
14 NOT who underwent delayed appendectomy, complicated appendicitis was found(7,9). The outcome  
15 in terms of post-appendectomy complications after delayed appendectomy (6.9%) is comparable to  
16 that for primary appendectomy (8.8%)(8).  
17  
18  
19

#### 20 *Follow-up/long-term effects*

21 Information regarding long-term results of NOT in simple appendicitis is limited and it is scarce in  
22 children. One study in children with an average follow-up of 4.3 years reported that 22 of 78 (29%)  
23 children treated with NOT experienced recurrent appendicitis(19), with a median time to recurrence  
24 of 6 months. Eight percent of all non-operatively treated children experienced recurrence after more  
25 than 1 year. The APAC trial has a follow-up of 1 year. However, all participants who have not been  
26 operated at the end of the study will be asked to participate in long-term follow-up. The long-term  
27 effects in children of losing the function of the appendix have also not yet been cleared up. The  
28 appendix might play a role in immunity and there is evidence that it is involved in preserving a  
29 healthy gut microbiome(34).  
30  
31  
32

#### 33 *Choice of antibiotic regime*

34 Most of the data on antibiotic susceptibility in appendicitis is derived from studies in adults, patients  
35 with complicated appendicitis, and mixed patient groups. There is some evidence available  
36 concerning children. A study analyzing cultures from children in Ireland with complicated  
37 appendicitis revealed that the combination therapy of amoxicillin-clavulanic acid and  
38 aminoglycosides would be appropriate in 99% of children with bacterial appendicitis-related  
39 peritonitis(35). Since antibiotic resistance rates are greatly dependent on geography, we can expect  
40 comparable or even better results in the Netherlands, considering it has the lowest rates of antibiotic  
41 use in Europe(36). Combined with a low rate of complications and extensive experience with  
42 amoxicillin-clavulanic acid and gentamicin, we consider it the most sensible regime. Further research  
43 is carried out by our research group analyzing the microbiome in simple and complicated  
44 appendicitis. Hopefully this will contribute in determining the best antibiotic regime. If non-operative  
45 treatment of appendicitis is shown to be non-inferior in this trial, further research should determine  
46 the most sensible regime and treatment duration. The first pilot RCT evaluating outpatient  
47 conservative management in a mixed group (children and adults) has already been published(37).  
48  
49  
50  
51  
52

#### 53 *Antibiotic resistance*

54 A possible downside of NOT as opposed to surgery could be increased antibiotic resistance(38).  
55 Interestingly, a study evaluating bacterial resistance in complicated appendicitis in children showed  
56 no significant increase in resistance rates over the past 20 year(39). How this translates to bacterial  
57 resistance when simple appendicitis is treated with antibiotics, is unclear. The use of multi-drug  
58  
59  
60

1  
2  
3 treatment regimens has been pointed out as one of the possibilities to reduce the development of  
4 resistant bacteria(40). Our choice for amoxicillin-clavulanic acid and gentamicin prevents us from  
5 having to use so-called reserve antibiotics, unlike most of the other know studies in children, in which  
6 for instance piperacillin-tazobactam is the drug of choice. Also when the symptoms do not resolve  
7 under the chosen antibiotic regimen, appendectomy is performed; we do not switch to other  
8 antibiotics.  
9

#### 10 11 *Value of histologic evaluation*

12 An occasionally mentioned argument(8) against non-operative treatment of appendicitis is the risk of  
13 missing other underlying causes of appendicitis, such as a carcinoid. One study repeated the  
14 abdominal ultrasound in children 1-3 months after NOT to ensure the diameter of the appendix  
15 returned to normal(19). The value of this strategy is unknown. In an analysis of 241 histopathologic  
16 appendectomy samples in children with simple appendicitis, 4 (1.6%) showed unexpected  
17 findings(41). Three parasitic infections and one Walthard cell rest were found; none of the findings  
18 required further treatment or investigation. The frequency of appendiceal carcinoid tumors in  
19 children undergoing appendectomy was 0.2%(42) and in less than 20% of these cases lymphovascular  
20 or mesenteric involvement was present. This seems a negligible risk and it is yet unclear if patients  
21 who are excluded or unresponsive to NOT are also the patients with the highest risk of having a  
22 malignancy as underlying cause.  
23  
24  
25  
26  
27  
28  
29  
30  
31  
32  
33  
34  
35  
36  
37  
38  
39  
40  
41  
42  
43  
44  
45  
46  
47  
48  
49  
50  
51  
52  
53  
54  
55  
56  
57  
58  
59  
60

## Footnotes

**Collaborators:** The surgical, pediatric, radiology, pharmacy and emergency medicine departments of the following Dutch hospitals contribute to the execution of this trial: Academic Medical Center, Amsterdam, The Netherlands; Ziekenhuis Amstelland, Amstelveen, The Netherlands; Catharina ziekenhuis, Eindhoven, The Netherlands; Elkerliek ziekenhuis, Helmond, The Netherlands; Erasmus Medical Center, Rotterdam, The Netherlands; Flevoziekenhuis, Almere, The Netherlands; Gelre Ziekenhuis, Apeldoorn, The Netherlands; Maxima Medical Center, Veldhoven, The Netherlands; Maastricht University Medical Center, Maastricht, The Netherlands; Noordwest Ziekenhuisgroep, Alkmaar, The Netherlands; OLVG, Amsterdam, The Netherlands; Rode Kruis Ziekenhuis, Beverwijk, The Netherlands; St. Antonius ziekenhuis, Nieuwegein, The Netherlands; University medical center Radboud, Nijmegen, The Netherlands; University Medical Center, Utrecht, The Netherlands; VU University Medical Center, Amsterdam, The Netherlands; Zuyderland, Heerlen/Sittard, The Netherlands.

## Acknowledgments

Due to the multi-center and multidisciplinary nature of the trial not all supporting researchers can be mentioned by name. However we would like to acknowledge all supporting pediatricians, radiologists, pharmacists, emergency medicine physicians and pediatric nurses. And we would like to thank all of the supporting staff and other physicians that make the realization of this trial possible. We would also like to acknowledge the Dutch Foundation Children and Hospital for their advice and support in drafting the protocol.

**Authors' contributions:** All authors have contributed to the design of this trial protocol. RRG, JHvdL and HAH were responsible for initiating the trial, with RB being the principal investigator. The protocol was drafted by RRG with contributions of JHvdL, SLT and HAH. Statistical advice was provided by JHvdL. MK was responsible for drafting the manuscript. All authors have contributed to the manuscript and read and approved the final manuscript.

## Data sharing statement:

The trial is registered on ClinicalTrials.gov and the Dutch trial registry, both of which are open access. The study findings will be presented in a report which will be submitted for publication in a relevant peer-reviewed journal to ensure dissemination to relevant healthcare professionals. Findings may also be submitted for presentation at local meetings or conferences. The participant-level data set may be made available for meta-analyses pending relevant Medical Ethics Review Committee approval.

**Funding statement:** This work is supported by The Netherlands Organization for Health Research and Development (ZonMw) grantnumber 843002708.

**Competing interests statement:** None to declare



## Full references

1. Addiss DG, Shaffer N, Fowler BS, Tauxe R V. the Epidemiology of Appendicitis and Appendectomy in the United States. *Am J Epidemiol.* 1990 Nov;132(5):910–25.
2. Anderson JE, Bickler SW, Chang DC, Talamini MA. Examining a common disease with unknown etiology: trends in epidemiology and surgical management of appendicitis in California, 1995-2009. *World J Surg.* 2012;36(12):2787–94.
3. Livingston EH, Woodward WA, Sarosi GA, Haley RW. Disconnect between incidence of nonperforated and perforated appendicitis: implications for pathophysiology and management. *Ann Surg.* 2007 Jun;245(6):886–92.
4. Andersson RE. The natural history and traditional management of appendicitis revisited: spontaneous resolution and predominance of prehospital perforations imply that a correct diagnosis is more important than an early diagnosis. *World J Surg.* 2007 Jan;31(1):86–92.
5. Rubér M, Andersson M, Petersson BF, Olaison G, Andersson RE, Ekerfelt C. Systemic Th17-like cytokine pattern in gangrenous appendicitis but not in phlegmonous appendicitis. *Surgery.* 2010 Mar;147(3):366–72.
6. Carr NJ. The pathology of acute appendicitis. *Ann Diagn Pathol.* 2000 Feb;4(1):46–58.
7. Sallinen V, Akl EA, You JJ, Agarwal A, Shoucair S, Vandvik PO, et al. Meta-analysis of antibiotics versus appendicectomy for non-perforated acute appendicitis. *Br J Surg.* 2016 Mar;103(6):656–67.
8. Harnoss JC, Zelenka I, Probst P, Grummich K, Müller-Lantzsch C, Harnoss JM, et al. Antibiotics Versus Surgical Therapy for Uncomplicated Appendicitis. *Ann Surg.* 2017 Oct;265(5):889–900.
9. Rollins KE, Varadhan KK, Neal KR, Lobo DN. Antibiotics Versus Appendicectomy for the Treatment of Uncomplicated Acute Appendicitis: An Updated Meta-Analysis of Randomised Controlled Trials. *World J Surg.* 2016 Oct;40(10):2305–18.
10. David E Wesson. Acute appendicitis in children: Clinical manifestations and diagnosis - UpToDate [Internet]. May 03, 2017. 2017 [cited 2017 Jun 7]. Available from: <https://www.uptodate.com/contents/acute-appendicitis-in-children-clinical-manifestations-and-diagnosis>
11. Georgiou R, Eaton S, Stanton MP, Pierro A, Hall NJ. Efficacy and Safety of Nonoperative Treatment for Acute Appendicitis: A Meta-analysis. *Pediatrics.* 2017 Feb;139(3):e20163003.
12. Xu J, Liu YC, Adams S, Karpelowsky J. Acute uncomplicated appendicitis study: rationale and protocol for a multicentre, prospective randomised controlled non-inferiority study to evaluate the safety and effectiveness of non-operative management in children with acute uncomplicated appendicitis. *BMJ Open.* 2016;6(12):e013299.
13. Hall NJ, Eaton S, Abbo O, Arnaud AP, Beaudin M, Brindle M, et al. Appendectomy versus non-operative treatment for acute uncomplicated appendicitis in children: study protocol for a multicentre, open-label, non-inferiority, randomised controlled trial. *BMJ Paediatr Open.* 2017 May;1(1).
14. Jason Fisher. Comparison of Medical and Surgical Treatment of Uncomplicated Acute Appendicitis in Children - Full Text View - ClinicalTrials.gov [Internet]. December 9, 2016. 2016



- [cited 2017 Jun 7]. Available from: <https://clinicaltrials.gov/ct2/show/NCT02991937>
15. Peter Minneci NCH. Multi-institutional Trial of Non-operative Management of Appendicitis - Full Text View - ClinicalTrials.gov [Internet]. Last updated: August 18, 2016. 2014 [cited 2017 Jun 7]. Available from: <https://clinicaltrials.gov/ct2/show/NCT02271932>
  16. Chan A-W, Tetzlaff JM, Altman DG, Laupacis A, Gøtzsche PC, Krleža-Jerić K, et al. SPIRIT 2013 Statement: Defining Standard Protocol Items for Clinical Trials. *Ann Intern Med*. 2013;158(3):200.
  17. Goldstein B, Giroir B, Randolph A, International Consensus Conference on Pediatric Sepsis. International pediatric sepsis consensus conference: definitions for sepsis and organ dysfunction in pediatrics. *Pediatr Crit Care Med*. 2005 Jan;6(1):2–8.
  18. Vons C, Barry C, Maitre S, Pautrat K, Leconte M, Costaglioli B, et al. Amoxicillin plus clavulanic acid versus appendectomy for treatment of acute uncomplicated appendicitis: an open-label, non-inferiority, randomised controlled trial. *Lancet (London, England)*. 2011 May;377(9777):1573–9.
  19. Tanaka Y, Uchida H, Kawashima H, Fujiogi M, Takazawa S, Deie K, et al. Long-term outcomes of operative versus nonoperative treatment for uncomplicated appendicitis. *J Pediatr Surg*. 2015;50(11):1893–7.
  20. Svensson JF, Patkova B, Almström M, Naji H, Hall NJ, Eaton S, et al. Nonoperative Treatment With Antibiotics Versus Surgery for Acute Nonperforated Appendicitis in Children. *Ann Surg*. 2015 Jan;261(1):67–71.
  21. Gorter RR, van den Boom AL, Heij HA, Kneepkens CM, Hulsker CC, Tenhagen M, et al. A scoring system to predict the severity of appendicitis in children. *J Surg Res*. 2016;200(2):452–9.
  22. Castor Electronic Data Capture. Amsterdam, The Netherlands: Ciwit BV; 2016.
  23. Gorter RR, van der Lee JH, Cense HA, Kneepkens CM, Wijnen MH, In 't Hof KH, et al. Initial antibiotic treatment for acute simple appendicitis in children is safe: Short-term results from a multicenter, prospective cohort study. *Surgery*. 2015;157(5):916–23.
  24. Dutch Association for Surgery. Dutch national guideline: Diagnosis and Treatment of Acute Appendicitis. 2010.
  25. Dutch Association of Pediatrics. Dutch national guideline: Pain measurement and management of pain in children. Utrecht; 2007.
  26. Landgraf JM, Abetz L WJ. The CHQ User's Manual. Boston: The Health Institute, New England Medical Center; 1996.
  27. Wille N, Badia X, Bonsel G, Burström K, Cavrini G, Devlin N, et al. Development of the EQ-5D-Y: a child-friendly version of the EQ-5D. *Qual Life Res*. 2010 Aug;19(6):875–86.
  28. Thayaparan AJ, Mahdi E. The Patient Satisfaction Questionnaire Short Form (PSQ-18) as an adaptable, reliable, and validated tool for use in various settings. *Med Educ Online*. 2013;18(1):21747.
  29. Bouwmans C, Hakkaart-van Roijen L, Koopmanschap M, Krol M, Severens H BW. Manuel: iMTA Medical Cost Questionnaire (iMCQ). Rotterdam: iMTA, Erasmus Universiteit Rotterdam;

- 1  
2  
3 2013.
- 4  
5 30. Bouwmans C, Krol M, Severens H, Koopmanschap M, Brouwer W, Hakkaart-van Roijen L. The  
6 iMTA Productivity Cost Questionnaire: A Standardized Instrument for Measuring and Valuing  
7 Health-Related Productivity Losses. *Value Health*. 2015 Sep;18(6):753–8.
- 8  
9 31. Rehal S, Morris TP, Fielding K, Carpenter JR, Phillips PPJ. Non-inferiority trials: are they  
10 inferior? A systematic review of reporting in major medical journals. *BMJ Open*. 2016  
11 Oct;6(10):e012594.
- 12  
13 32. van Rossem CC, Bolmers MDM, Schreinemacher MHF, van Geloven AAW, Bemelman WA.  
14 Prospective nationwide outcome audit of surgery for suspected acute appendicitis. *Br J Surg*.  
15 2016 Jan;103(1):144–51.
- 16  
17 33. Collaborative. NSR. Multicentre observational study of performance variation in provision and  
18 outcome of emergency appendicectomy. *Br J Surg*. 2013 Aug;100(9):1240–52.
- 19  
20 34. Randal Bollinger R, Barbas AS, Bush EL, Lin SS, Parker W. Biofilms in the large bowel suggest an  
21 apparent function of the human vermiform appendix. *J Theor Biol*. 2007 Dec;249(4):826–31.
- 22  
23 35. Obinwa O, Casidy M, Flynn J. The microbiology of bacterial peritonitis due to appendicitis in  
24 children. *Irish J Med Sci (1971 -)*. 2014 Dec;183(4):585–91.
- 25  
26 36. European Centre for Disease Prevention and Control, Stockholm 2015. ECDC Summary of the  
27 latest data on antibiotic consumption in the EU Antibiotic consumption in Europe. In 2015.
- 28  
29 37. Talan DA, Saltzman DJ, Mower WR, Krishnadasan A, Jude CM, Amii R, et al. Antibiotics-First  
30 Versus Surgery for Appendicitis: A US Pilot Randomized Controlled Trial Allowing Outpatient  
31 Antibiotic Management. *Ann Emerg Med*. 2016;
- 32  
33 38. Andersson RE. The role of antibiotic therapy in the management of acute appendicitis. *Curr  
34 Infect Dis Rep*. 2013 Feb;15(1):10–3.
- 35  
36 39. Schmitt F, Clermidi P, Dorsi M, Cocquerelle V, Gomes CF, Becmeur F. Bacterial studies of  
37 complicated appendicitis over a 20-year period and their impact on empirical antibiotic  
38 treatment. *J Pediatr Surg*. 2012 Nov;47(11):2055–62.
- 39  
40 40. Hughes D, Andersson DI. Evolutionary consequences of drug resistance: shared principles  
41 across diverse targets and organisms. *Nat Rev Genet*. Nature Publishing Group, a division of  
42 Macmillan Publishers Limited. All Rights Reserved.; 2015 Aug;16(8):459–71.
- 43  
44 41. Gorter RR, van Amstel P, van der Lee JH, van der Voorn P, Bakx R, Heij HA. Unexpected  
45 findings after surgery for suspected appendicitis rarely change treatment in pediatric patients;  
46 Results from a cohort study. *J Pediatr Surg*. 2017;
- 47  
48 42. Fallon SC, Hicks MJ, Carpenter JL, Vasudevan SA, Nuchtern JG, Cass DL. Management of  
49 appendiceal carcinoid tumors in children. *J Surg Res*. 2015 Oct;198(2):384–7.
- 50  
51  
52  
53  
54  
55  
56  
57  
58  
59  
60

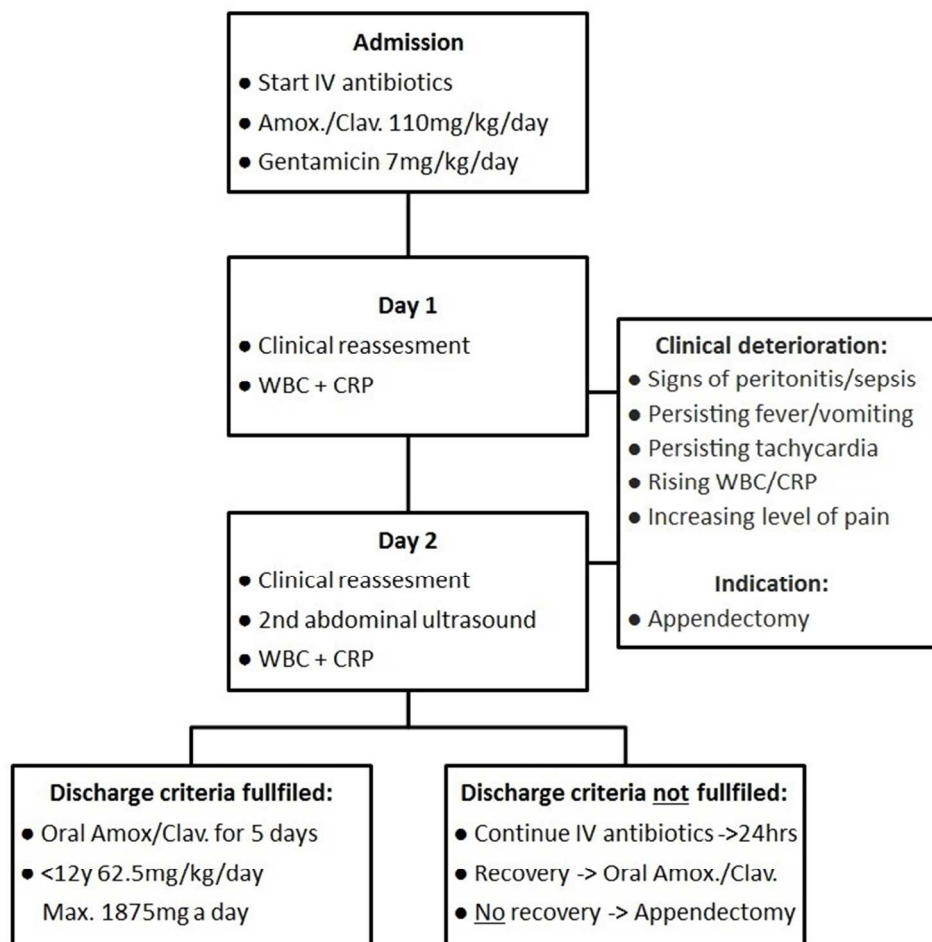

Figure 1. Flowchart non-operative management

212x205mm (96 x 96 DPI)

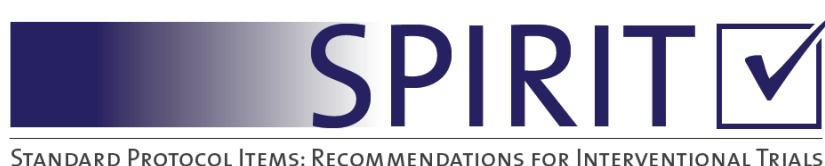

SPIRIT 2013 Checklist: Recommended items to address in a clinical trial protocol and related documents\*

| Section/item                      | Item No | Description                                                                                                                                                                                                                                                                              | Addressed on page number |
|-----------------------------------|---------|------------------------------------------------------------------------------------------------------------------------------------------------------------------------------------------------------------------------------------------------------------------------------------------|--------------------------|
| <b>Administrative information</b> |         |                                                                                                                                                                                                                                                                                          |                          |
| Title                             | 1       | Descriptive title identifying the study design, population, interventions, and, if applicable, trial acronym                                                                                                                                                                             | _____                    |
| Trial registration                | 2a      | Trial identifier and registry name. If not yet registered, name of intended registry                                                                                                                                                                                                     | _____                    |
|                                   | 2b      | All items from the World Health Organization Trial Registration Data Set                                                                                                                                                                                                                 | _____                    |
| Protocol version                  | 3       | Date and version identifier                                                                                                                                                                                                                                                              | _____                    |
| Funding                           | 4       | Sources and types of financial, material, and other support                                                                                                                                                                                                                              | _____                    |
| Roles and responsibilities        | 5a      | Names, affiliations, and roles of protocol contributors                                                                                                                                                                                                                                  | _____                    |
|                                   | 5b      | Name and contact information for the trial sponsor                                                                                                                                                                                                                                       | _____                    |
|                                   | 5c      | Role of study sponsor and funders, if any, in study design; collection, management, analysis, and interpretation of data; writing of the report; and the decision to submit the report for publication, including whether they will have ultimate authority over any of these activities | _____                    |
|                                   | 5d      | Composition, roles, and responsibilities of the coordinating centre, steering committee, endpoint adjudication committee, data management team, and other individuals or groups overseeing the trial, if applicable (see Item 21a for data monitoring committee)                         | _____                    |

|    |                                                           |     |                                                                                                               |       |
|----|-----------------------------------------------------------|-----|---------------------------------------------------------------------------------------------------------------|-------|
| 1  | <b>Introduction</b>                                       |     |                                                                                                               |       |
| 2  |                                                           |     |                                                                                                               |       |
| 3  | Background and                                            | 6a  | Description of research question and justification for undertaking the trial, including summary of relevant   | _____ |
| 4  | rationale                                                 |     | studies (published and unpublished) examining benefits and harms for each intervention                        |       |
| 5  |                                                           |     |                                                                                                               |       |
| 6  |                                                           | 6b  | Explanation for choice of comparators                                                                         | _____ |
| 7  |                                                           |     |                                                                                                               |       |
| 8  | Objectives                                                | 7   | Specific objectives or hypotheses                                                                             | _____ |
| 9  |                                                           |     |                                                                                                               |       |
| 10 | Trial design                                              | 8   | Description of trial design including type of trial (eg, parallel group, crossover, factorial, single group), | _____ |
| 11 |                                                           |     | allocation ratio, and framework (eg, superiority, equivalence, noninferiority, exploratory)                   |       |
| 12 |                                                           |     |                                                                                                               |       |
| 13 |                                                           |     |                                                                                                               |       |
| 14 |                                                           |     |                                                                                                               |       |
| 15 | <b>Methods: Participants, interventions, and outcomes</b> |     |                                                                                                               |       |
| 16 |                                                           |     |                                                                                                               |       |
| 17 | Study setting                                             | 9   | Description of study settings (eg, community clinic, academic hospital) and list of countries where data will | _____ |
| 18 |                                                           |     | be collected. Reference to where list of study sites can be obtained                                          |       |
| 19 |                                                           |     |                                                                                                               |       |
| 20 | Eligibility criteria                                      | 10  | Inclusion and exclusion criteria for participants. If applicable, eligibility criteria for study centres and  | _____ |
| 21 |                                                           |     | individuals who will perform the interventions (eg, surgeons, psychotherapists)                               |       |
| 22 |                                                           |     |                                                                                                               |       |
| 23 | Interventions                                             | 11a | Interventions for each group with sufficient detail to allow replication, including how and when they will be | _____ |
| 24 |                                                           |     | administered                                                                                                  |       |
| 25 |                                                           |     |                                                                                                               |       |
| 26 |                                                           | 11b | Criteria for discontinuing or modifying allocated interventions for a given trial participant (eg, drug dose  | _____ |
| 27 |                                                           |     | change in response to harms, participant request, or improving/worsening disease)                             |       |
| 28 |                                                           |     |                                                                                                               |       |
| 29 |                                                           | 11c | Strategies to improve adherence to intervention protocols, and any procedures for monitoring adherence        | _____ |
| 30 |                                                           |     | (eg, drug tablet return, laboratory tests)                                                                    |       |
| 31 |                                                           |     |                                                                                                               |       |
| 32 |                                                           | 11d | Relevant concomitant care and interventions that are permitted or prohibited during the trial                 | _____ |
| 33 |                                                           |     |                                                                                                               |       |
| 34 | Outcomes                                                  | 12  | Primary, secondary, and other outcomes, including the specific measurement variable (eg, systolic blood       | _____ |
| 35 |                                                           |     | pressure), analysis metric (eg, change from baseline, final value, time to event), method of aggregation (eg, |       |
| 36 |                                                           |     | median, proportion), and time point for each outcome. Explanation of the clinical relevance of chosen         |       |
| 37 |                                                           |     | efficacy and harm outcomes is strongly recommended                                                            |       |
| 38 |                                                           |     |                                                                                                               |       |
| 39 | Participant timeline                                      | 13  | Time schedule of enrolment, interventions (including any run-ins and washouts), assessments, and visits for   | _____ |
| 40 |                                                           |     | participants. A schematic diagram is highly recommended (see Figure)                                          |       |
| 41 |                                                           |     |                                                                                                               |       |
| 42 |                                                           |     |                                                                                                               |       |
| 43 |                                                           |     |                                                                                                               |       |
| 44 |                                                           |     |                                                                                                               |       |
| 45 |                                                           |     |                                                                                                               |       |
| 46 |                                                           |     |                                                                                                               |       |
| 47 |                                                           |     |                                                                                                               |       |

1 Sample size 14 Estimated number of participants needed to achieve study objectives and how it was determined, including \_\_\_\_\_  
 2 clinical and statistical assumptions supporting any sample size calculations

3  
 4 Recruitment 15 Strategies for achieving adequate participant enrolment to reach target sample size \_\_\_\_\_  
 5

### 6 7 **Methods: Assignment of interventions (for controlled trials)**

#### 8 9 Allocation:

10 Sequence 16a Method of generating the allocation sequence (eg, computer-generated random numbers), and list of any \_\_\_\_\_  
 11 generation factors for stratification. To reduce predictability of a random sequence, details of any planned restriction  
 12 (eg, blocking) should be provided in a separate document that is unavailable to those who enrol participants  
 13 or assign interventions  
 14

15  
 16 Allocation 16b Mechanism of implementing the allocation sequence (eg, central telephone; sequentially numbered, \_\_\_\_\_  
 17 concealment opaque, sealed envelopes), describing any steps to conceal the sequence until interventions are assigned  
 18 mechanism  
 19

20 Implementation 16c Who will generate the allocation sequence, who will enrol participants, and who will assign participants to \_\_\_\_\_  
 21 interventions  
 22

23 Blinding (masking) 17a Who will be blinded after assignment to interventions (eg, trial participants, care providers, outcome \_\_\_\_\_  
 24 assessors, data analysts), and how  
 25

26  
 27 17b If blinded, circumstances under which unblinding is permissible, and procedure for revealing a participant's \_\_\_\_\_  
 28 allocated intervention during the trial  
 29

### 30 31 32 **Methods: Data collection, management, and analysis**

33  
 34 Data collection 18a Plans for assessment and collection of outcome, baseline, and other trial data, including any related \_\_\_\_\_  
 35 methods processes to promote data quality (eg, duplicate measurements, training of assessors) and a description of  
 36 study instruments (eg, questionnaires, laboratory tests) along with their reliability and validity, if known.  
 37 Reference to where data collection forms can be found, if not in the protocol  
 38

39  
 40 18b Plans to promote participant retention and complete follow-up, including list of any outcome data to be \_\_\_\_\_  
 41 collected for participants who discontinue or deviate from intervention protocols  
 42  
 43  
 44

|    |                     |     |                                                                                                              |       |
|----|---------------------|-----|--------------------------------------------------------------------------------------------------------------|-------|
| 1  | Data management     | 19  | Plans for data entry, coding, security, and storage, including any related processes to promote data quality | _____ |
| 2  |                     |     | (eg, double data entry; range checks for data values). Reference to where details of data management         |       |
| 3  |                     |     | procedures can be found, if not in the protocol                                                              |       |
| 4  |                     |     |                                                                                                              |       |
| 5  | Statistical methods | 20a | Statistical methods for analysing primary and secondary outcomes. Reference to where other details of the    | _____ |
| 6  |                     |     | statistical analysis plan can be found, if not in the protocol                                               |       |
| 7  |                     |     |                                                                                                              |       |
| 8  |                     | 20b | Methods for any additional analyses (eg, subgroup and adjusted analyses)                                     | _____ |
| 9  |                     |     |                                                                                                              |       |
| 10 |                     | 20c | Definition of analysis population relating to protocol non-adherence (eg, as randomised analysis), and any   | _____ |
| 11 |                     |     | statistical methods to handle missing data (eg, multiple imputation)                                         |       |
| 12 |                     |     |                                                                                                              |       |
| 13 |                     |     |                                                                                                              |       |

**Methods: Monitoring**

|    |                            |     |                                                                                                              |       |
|----|----------------------------|-----|--------------------------------------------------------------------------------------------------------------|-------|
| 15 | <b>Methods: Monitoring</b> |     |                                                                                                              |       |
| 16 |                            |     |                                                                                                              |       |
| 17 | Data monitoring            | 21a | Composition of data monitoring committee (DMC); summary of its role and reporting structure; statement of    | _____ |
| 18 |                            |     | whether it is independent from the sponsor and competing interests; and reference to where further details   |       |
| 19 |                            |     | about its charter can be found, if not in the protocol. Alternatively, an explanation of why a DMC is not    |       |
| 20 |                            |     | needed                                                                                                       |       |
| 21 |                            | 21b | Description of any interim analyses and stopping guidelines, including who will have access to these interim | _____ |
| 22 |                            |     | results and make the final decision to terminate the trial                                                   |       |
| 23 |                            |     |                                                                                                              |       |
| 24 |                            |     |                                                                                                              |       |
| 25 |                            |     |                                                                                                              |       |
| 26 | Harms                      | 22  | Plans for collecting, assessing, reporting, and managing solicited and spontaneously reported adverse        | _____ |
| 27 |                            |     | events and other unintended effects of trial interventions or trial conduct                                  |       |
| 28 |                            |     |                                                                                                              |       |
| 29 | Auditing                   | 23  | Frequency and procedures for auditing trial conduct, if any, and whether the process will be independent     | _____ |
| 30 |                            |     | from investigators and the sponsor                                                                           |       |
| 31 |                            |     |                                                                                                              |       |
| 32 |                            |     |                                                                                                              |       |

**Ethics and dissemination**

|    |                                 |    |                                                                                                             |       |
|----|---------------------------------|----|-------------------------------------------------------------------------------------------------------------|-------|
| 33 | <b>Ethics and dissemination</b> |    |                                                                                                             |       |
| 34 |                                 |    |                                                                                                             |       |
| 35 | Research ethics                 | 24 | Plans for seeking research ethics committee/institutional review board (REC/IRB) approval                   | _____ |
| 36 | approval                        |    |                                                                                                             |       |
| 37 |                                 |    |                                                                                                             |       |
| 38 | Protocol                        | 25 | Plans for communicating important protocol modifications (eg, changes to eligibility criteria, outcomes,    | _____ |
| 39 | amendments                      |    | analyses) to relevant parties (eg, investigators, REC/IRBs, trial participants, trial registries, journals, |       |
| 40 |                                 |    | regulators)                                                                                                 |       |
| 41 |                                 |    |                                                                                                             |       |
| 42 |                                 |    |                                                                                                             |       |
| 43 |                                 |    |                                                                                                             |       |

|    |                      |     |                                                                                                                 |       |
|----|----------------------|-----|-----------------------------------------------------------------------------------------------------------------|-------|
| 1  | Consent or assent    | 26a | Who will obtain informed consent or assent from potential trial participants or authorised surrogates, and      | _____ |
| 2  |                      |     | how (see Item 32)                                                                                               |       |
| 3  |                      |     |                                                                                                                 |       |
| 4  |                      | 26b | Additional consent provisions for collection and use of participant data and biological specimens in ancillary  | _____ |
| 5  |                      |     | studies, if applicable                                                                                          |       |
| 6  |                      |     |                                                                                                                 |       |
| 7  | Confidentiality      | 27  | How personal information about potential and enrolled participants will be collected, shared, and maintained    | _____ |
| 8  |                      |     | in order to protect confidentiality before, during, and after the trial                                         |       |
| 9  |                      |     |                                                                                                                 |       |
| 10 | Declaration of       | 28  | Financial and other competing interests for principal investigators for the overall trial and each study site   | _____ |
| 11 | interests            |     |                                                                                                                 |       |
| 12 |                      |     |                                                                                                                 |       |
| 13 |                      |     |                                                                                                                 |       |
| 14 | Access to data       | 29  | Statement of who will have access to the final trial dataset, and disclosure of contractual agreements that     | _____ |
| 15 |                      |     | limit such access for investigators                                                                             |       |
| 16 |                      |     |                                                                                                                 |       |
| 17 | Ancillary and post-  | 30  | Provisions, if any, for ancillary and post-trial care, and for compensation to those who suffer harm from trial | _____ |
| 18 | trial care           |     | participation                                                                                                   |       |
| 19 |                      |     |                                                                                                                 |       |
| 20 | Dissemination policy | 31a | Plans for investigators and sponsor to communicate trial results to participants, healthcare professionals,     | _____ |
| 21 |                      |     | the public, and other relevant groups (eg, via publication, reporting in results databases, or other data       |       |
| 22 |                      |     | sharing arrangements), including any publication restrictions                                                   |       |
| 23 |                      |     |                                                                                                                 |       |
| 24 |                      |     |                                                                                                                 |       |
| 25 |                      | 31b | Authorship eligibility guidelines and any intended use of professional writers                                  | _____ |
| 26 |                      |     |                                                                                                                 |       |
| 27 |                      | 31c | Plans, if any, for granting public access to the full protocol, participant-level dataset, and statistical code | _____ |
| 28 |                      |     |                                                                                                                 |       |
| 29 |                      |     |                                                                                                                 |       |
| 30 | <b>Appendices</b>    |     |                                                                                                                 |       |
| 31 |                      |     |                                                                                                                 |       |
| 32 | Informed consent     | 32  | Model consent form and other related documentation given to participants and authorised surrogates              | _____ |
| 33 | materials            |     |                                                                                                                 |       |
| 34 |                      |     |                                                                                                                 |       |
| 35 | Biological           | 33  | Plans for collection, laboratory evaluation, and storage of biological specimens for genetic or molecular       | _____ |
| 36 | specimens            |     | analysis in the current trial and for future use in ancillary studies, if applicable                            |       |
| 37 |                      |     |                                                                                                                 |       |

\*It is strongly recommended that this checklist be read in conjunction with the SPIRIT 2013 Explanation & Elaboration for important clarification on the items. Amendments to the protocol should be tracked and dated. The SPIRIT checklist is copyrighted by the SPIRIT Group under the Creative Commons "[Attribution-NonCommercial-NoDerivs 3.0 Unported](https://creativecommons.org/licenses/by-nc-nd/3.0/)" license.



# BMJ Open

## Initial non-operative management of uncomplicated appendicitis in children: A protocol for a multicenter randomized controlled trial (APAC trial)

|                                 |                                                                                                                                                                                                                                                                                                                                                                                                                                                                                                                                                                                                                                                                                                                                                                                                                                                     |
|---------------------------------|-----------------------------------------------------------------------------------------------------------------------------------------------------------------------------------------------------------------------------------------------------------------------------------------------------------------------------------------------------------------------------------------------------------------------------------------------------------------------------------------------------------------------------------------------------------------------------------------------------------------------------------------------------------------------------------------------------------------------------------------------------------------------------------------------------------------------------------------------------|
| Journal:                        | <i>BMJ Open</i>                                                                                                                                                                                                                                                                                                                                                                                                                                                                                                                                                                                                                                                                                                                                                                                                                                     |
| Manuscript ID                   | bmjopen-2017-018145.R1                                                                                                                                                                                                                                                                                                                                                                                                                                                                                                                                                                                                                                                                                                                                                                                                                              |
| Article Type:                   | Protocol                                                                                                                                                                                                                                                                                                                                                                                                                                                                                                                                                                                                                                                                                                                                                                                                                                            |
| Date Submitted by the Author:   | 21-Jul-2017                                                                                                                                                                                                                                                                                                                                                                                                                                                                                                                                                                                                                                                                                                                                                                                                                                         |
| Complete List of Authors:       | Knaapen, Max; Pediatric Surgical Center of Amsterdam; Emma Children's Hospital AMC and VU University Medical Center<br>van der Lee, Johanna H.; AMC, Pediatric Clinical Research Office<br>Bakx, Roel; Pediatric Surgical Center of Amsterdam; Emma Children's Hospital AMC and VU University Medical Center<br>The, Sarah-May; Pediatric Surgical Center of Amsterdam; Emma Children's Hospital AMC and VU University Medical Center<br>Van Heurn, Ernst; Pediatric Surgical Center of Amsterdam; Emma Children's Hospital AMC and VU University Medical Center<br>Heij, Hugo; Pediatric Surgical Center of Amsterdam; Emma Children's Hospital AMC and VU University Medical Center<br>Gorter, Ramon; Pediatric Surgical Center of Amsterdam; Emma Children's Hospital AMC and VU University Medical Center<br>. , APAC collaborative study group |
| <b>Primary Subject Heading</b>: | Surgery                                                                                                                                                                                                                                                                                                                                                                                                                                                                                                                                                                                                                                                                                                                                                                                                                                             |
| Secondary Subject Heading:      | Paediatrics                                                                                                                                                                                                                                                                                                                                                                                                                                                                                                                                                                                                                                                                                                                                                                                                                                         |
| Keywords:                       | PAEDIATRICS, Paediatric gastroenterology < PAEDIATRICS, PAEDIATRIC SURGERY, Paediatric colorectal surgery < PAEDIATRIC SURGERY, SURGERY                                                                                                                                                                                                                                                                                                                                                                                                                                                                                                                                                                                                                                                                                                             |
|                                 |                                                                                                                                                                                                                                                                                                                                                                                                                                                                                                                                                                                                                                                                                                                                                                                                                                                     |

SCHOLARONE™  
Manuscripts

1  
2  
3 **Initial non-operative management of uncomplicated appendicitis in children:**  
4 **A protocol for a multicenter randomized controlled trial (APAC trial)**  
5

6  
7 Knaapen M MD<sup>1</sup>, van der Lee JH MD, PhD<sup>2</sup>, Bakx R MD, PhD<sup>1</sup>, The SML<sup>1</sup>, van Heurn LWE MD, PhD<sup>1</sup>,  
8 Heij HA MD, PhD<sup>1</sup>, Gorter RR MD, PhD<sup>1</sup>, APAC collaborative study group  
9

- 10 1. Pediatric Surgical Center of Amsterdam; Emma Children's Hospital AMC and VU University  
11 Medical Center, Amsterdam, The Netherlands  
12 2. Pediatric Clinical Research Office, Academic Medical Center, Amsterdam, The Netherlands  
13

14  
15 Address correspondence to M. Knaapen, MD

16 Address: Pediatric Surgical Center of Amsterdam; Emma Children's Hospital AMC,  
17 P.O. Box 22660, 1100 DD, Amsterdam, The Netherlands

18 Email: M.Knaapen@AMC.UvA.nl

19 Telephone: +31-20-444-2424

20 Fax: +31-20-444-2135  
21

22  
23 Funding statement: This work is supported by The Netherlands Organization for Health Research and  
24 Development (ZonMw) grantnumber 843002708.  
25

26 Competing interests statement: None to declare  
27  
28  
29  
30  
31  
32  
33  
34  
35  
36  
37  
38  
39  
40  
41  
42  
43  
44  
45  
46  
47  
48  
49  
50  
51  
52  
53  
54  
55  
56  
57  
58  
59  
60

## Abstract

### Introduction

Based on epidemiological, immunological and pathology data the idea that appendicitis is not necessarily a progressive disease is gaining ground. Two types are distinguished: simple and complicated appendicitis. Non-operative treatment (NOT) of children with simple appendicitis has been investigated in several small studies. So far it is deemed safe. However, its effectiveness and effect on quality of life (QoL) has yet to be established in a adequately powered randomized trial. In this article we provide the study protocol for the APAC trial.

### Methods and analysis

This multicenter, non-inferiority, randomized controlled trial, randomizes children aged 7 to 17 years with imaging-confirmed simple appendicitis between appendectomy and NOT. Patients are recruited in 15 hospitals. The intended sample size, based on the primary outcome, rate of complications and a non-inferiority margin of 5%, is 334 patients.

NOT consists of IV antibiotics for 48-72 hours, daily blood tests, and ultrasound follow-up. If the patient meets the pre-defined discharge criteria, antibiotic treatment is continued orally at home. Primary outcome is the rate of complications at one year follow-up. An independent adjudication committee will assess all complications and their relation to the allocated treatment. Secondary outcomes include, but are not limited to, delayed appendectomies, QoL, pain, (in)direct costs. The primary outcome will be analysed both according to the intention-to-treat and to the per-protocol principle, and is presented with a one-sided 97.5% confidence interval. We will use multiple logistic and linear regression for binary and continuous outcomes, respectively, to adjust for stratification factors.

### Ethics and dissemination.

The protocol has been approved by the Medical Ethics Review Committee of the Academic Medical Center, Amsterdam. Data monitoring is performed by an independent institute and a Data Safety Monitoring Board has been assigned. Results will be presented in peer-reviewed academic journals and at (international) conferences.

### Registration details

NCT02848820; NTR5977

## Strengths and limitations of this study

1. Meticulous selection of children with uncomplicated appendicitis using strict (evidence based) criteria, including ultrasonography.
2. Elaborate follow-up on patient, parent, hospital and economic-level.
3. An independent adjudication committee assessing all complications and their relation to the allocated treatment.
4. The non-inferiority design does not allow for a superiority comparison of the rate of complications.

## Introduction

Appendicitis is a common gastro-intestinal disease with a lifetime incidence of 7-9%(1,2). Based on the assumption that urgent removal of the appendix is necessary to avoid progressive inflammation with subsequent necrosis and perforation of the appendix, emergency appendectomy has been the standard of care since 1889. However, based on epidemiological, immunological and pathology data, several experts have stated(3–6) that appendicitis is not necessarily a progressive disease. Rather, they endorse the idea that two types of appendicitis exist: simple or uncomplicated appendicitis and complicated appendicitis. Over the years, there has been a shift towards non-operative treatment strategies for diseases which were historically treated surgically, for instance, stomach ulcers and uncomplicated diverticulitis. More recently, non-operative treatment (NOT) of acute uncomplicated appendicitis (AUA) has become the subject of investigation. This strategy consists of initial treatment with intravenous antibiotics and reserves appendectomy for non-responders and those with recurrent appendicitis.

Several randomized controlled trials (RCTs) looked at the non-operative treatment of AUA in the adult population. Results, however, vary. Most trials conclude that NOT is safe, but the reported reduction of complications varies from no significant differences(7,8) to up to 86% reduction(9). Recurrent symptoms resulting in delayed appendectomy occur in roughly 1 in 4 patients(7,8,10). These numbers are interpreted in different ways, as is illustrated by the conclusions of three recent systematic reviews, which range from indicating NOT as the preferred treatment(10) to rejecting it as a routine treatment due to insufficient knowledge about its impact on quality of life (QoL)(8).

Approximately one third of all cases of appendicitis occur under the age of 20 years. Regarding the distribution of uncomplicated and complicated appendicitis in the pediatric population, the percentage of uncomplicated appendicitis is reported to range between 68-90% in children aged 5 to 18 years(2,11). The percentage of complicated appendicitis increases with age(12), therefore reducing the amount of patients suitable for initial non-operative treatment strategy. Potential benefits of initial non-operative treatment strategy might therefore be higher for the pediatric population than for the adult population. Data in the pediatric population on the outcome of NOT for uncomplicated appendicitis is scarce and consists mainly of uncontrolled studies with small patient numbers. Recently a systematic review was published, including 10 studies (1 pilot RCT, 6 prospective cohorts and 3 retrospective cohorts) with a total of 413 children treated with NOT(13). Overall complications were reported in 5 of the 6 comparative studies. One out of 175 (0.6%) patients in the NOT group suffered complications vs. 9/239 (3.8%) patients in the primary appendectomy group. Follow-up ranged from 8 weeks to 4 years, with 82% of the NOT patients not having undergone appendectomy at follow-up completion. Recurrent appendicitis occurred in 68/396 (17%) patients; this included 19 children who were treated with a second course of antibiotics.

1  
2  
3 The evidence regarding the outcome of NOT in the pediatric population is far from sufficient. As of  
4 today, apart from the trial described in this article, four large clinical studies (three RCTs(14–16) and  
5 one prospective patient preference study(17)) are recruiting children for a comparison of primary  
6 appendectomy with NOT. In the Antibiotics versus Primary Appendectomy in Children (APAC) trial we  
7 aim to evaluate the effectiveness of the initial NOT strategy (reserving appendectomy for those not  
8 responding or with recurrent disease) compared to immediate appendectomy in terms of  
9 complications, health-related QoL and costs in children aged 7 to 17 years with AUA.  
10  
11

## 12 **Methods and analysis**

### 13 ***Study design***

14 The APAC trial is a multicenter non-inferiority randomized controlled trial. Blinding was not deemed  
15 feasible. The protocol was drafted in accordance with the SPIRIT statements (Standard Protocol  
16 Items: Recommendations for Interventional Trials)(18). This trial was registered at clinicaltrials.gov  
17 (NCT02848820) and the Dutch Trial Registry (NTR5977) prior to the start of inclusion.  
18  
19

### 20 ***Patient selection***

21 Eligible for inclusion are children 7 to 17 years old of both sexes, in whom a imaging-confirmed acute  
22 uncomplicated appendicitis is diagnosed in the emergency department of one of the participating  
23 hospitals.  
24  
25

### 26 ***Inclusion criteria***

27 Definition of AUA is based upon the following criteria.  
28  
29

- 30 • Clinical & biochemical criteria:
  - 31 - Localized tenderness in the right iliac fossa region
  - 32 - Normal/hyperactive bowel sounds
  - 33 - No guarding or palpable mass
  - 34 - Biochemical signs of infection:
    - 35 - Elevated white blood cell count (WBC)
    - 36 - Elevated C-reactive protein (CRP)
- 37 • Ultrasound criteria to confirm the diagnosis of AUA:
  - 38 - A non-compressible, painful appendix with an outer diameter > 6 mm
  - 39 - Secondary signs of inflammation, i.e. infiltration of the surrounding fat
  - 40 - Hyperemia within the appendiceal wall

41 In case the ultrasound is inconclusive, additional imaging (MRI or CAT-scan) may be obtained.  
42  
43  
44

### 45 ***Exclusion criteria***

- 46 - Generalized peritonitis or sepsis (as defined by the international pediatric sepsis  
47 consensus conference(19))
  - 48 - Findings on imaging indicative of complex appendicitis:
    - 49 - significant and/or unclear free fluid
    - 50 - signs of perforation
    - 51 - signs of intra-abdominal abscess or phlegmone
- 52  
53  
54  
55  
56  
57  
58  
59  
60

- Children with a suspicion of an appendiceal faecalith on imaging studies are excluded, because of its association with a higher risk of NOT failure(20–23).  
Ultrasound characteristics for an appendicalith are defined as a echogenic, well-defined focus within the appendix with posterior acoustic shadowing.
- Serious co-morbidity such as cardiac or pulmonary disease with significant hemodynamic consequences, immunodeficiency, malignancy or sickle cell disease
- A history of non-operatively treated appendicitis
- Suspicion of an underlying malignancy or inflammatory bowel disease
- Documented type 1 allergy to the antibiotics used
- A complex appendicitis risk score indicative of complex appendicitis

#### *Complex appendicitis risk score*

A pediatric scoring system is used(24) predicting the risk of having complex appendicitis based upon five pre-operative variables; abdominal guarding, signs of complex appendicitis on ultrasound, CRP level, temperature and days of abdominal pain. In an independent validation in a second pediatric cohort a score below 4 had a negative predictive value of 98% (95% confidence interval(CI) 88-100%). Children presenting with a score of 4 or higher will be excluded from this study because of the risk of having complicated appendicitis.

#### **Randomization**

After written informed consent from parents and child (assent from children under the age of 12) patients are randomized using the web-based randomization program Castor Electronic Data Capture version 4.10(25), stratified by center. A variable block algorithm is used to ensure concealment of allocation.

#### **Sample size calculation**

A non-inferiority design is used based upon the notion that NOT potentially has secondary advantages, for instance cost reduction and less pain(26). We hypothesize that this might also be the case for QoL. It would thus be sufficient to demonstrate that the outcome in terms of complications is not worse in the NOT group compared to the immediate appendectomy group.

In our pilot study(27) we followed the children eligible for non-operative treatment who refused participation in that study and received immediate appendectomy instead of antibiotic treatment. The frequency of post-operative complications in this group at 1-year follow-up was approximately 10% (unpublished data), meaning that 90% was successfully treated without complications in the operative group. If the difference in complication rate between NOT and operative treatment is less than 5% in favour of appendectomy, non-inferiority is assumed. We will not be testing for the superiority of NOT. Using a 1-sided alpha of 2.5% in accordance with the non-inferiority design, 150 patients per group are needed to achieve 90% power for the exclusion of a difference in favour of the usual care group of more than 5%. Although in our pilot study(27) the drop-out rate after one year was only 2%, we take into account a drop-out rate of 10%. Therefore, the number of patients to be included is 334.

#### **Study setting and feasibility**

Eligible patients are recruited in 15 hospitals across the Netherlands. This selection consists of both academic and large teaching hospitals. Inclusion started in January 2017. Based on data supplied by

the participating hospitals approximately 225 children per year will meet the inclusion criteria. In our pilot study 57% of eligible patients participated. Taking these numbers into account we expect to include 128 patients per year. We therefore expect to complete inclusion within 32 months. All of the clinical, biochemical and imaging assessments are part of the standard work-up for children suspected of having appendicitis in the Netherlands, as described in the Dutch national guideline(28).

### **Interventions**

#### *Non-operative management*

Antibiotic treatment consists of 48 hours of intravenous (IV) amoxicillin/clavulanic acid 25/2.5 mg/kg 6-hourly (maximum dose: 6000/600 mg per day) and gentamicin (7 mg/kg once daily). When the patient meets the pre-defined discharge criteria after 48 hours (Table 1) he/she is discharged with oral antibiotics. If not, IV antibiotics are continued with a maximum total duration of 72 hours. Oral treatment consists of amoxicillin/clavulanic acid 50/12.5 mg/kg in three daily doses (maximum dose: 1500/375 mg per day). Total duration of antibiotic treatment is 7 days.

| <b>Pre-defined discharge criteria (equal for both interventions)</b> |                                                                |
|----------------------------------------------------------------------|----------------------------------------------------------------|
| 1.                                                                   | Body temperature < 38.0 degrees Celsius                        |
| 2.                                                                   | NRS <4                                                         |
| 3.                                                                   | Adequate oral intake                                           |
| 4.                                                                   | Able to mobilize                                               |
| 5.                                                                   | Consent of parents for discharge                               |
| <b>Pre-defined discharge only for non-operative management</b>       |                                                                |
| 6.                                                                   | Decreased leukocytosis                                         |
| 7.                                                                   | Decreased C-reactive protein                                   |
| 8.                                                                   | No signs of complex appendicitis on 2 <sup>nd</sup> ultrasound |

**Table 1. Pre-defined discharge criteria. All criteria have to be met to allow patient to be discharged**

To optimize early detection of NOT failure, WBC and CRP are measured every 24 hours during the time of administration of IV antibiotics. After 48 hours the abdominal ultrasound is repeated to check for signs of complicated appendicitis. Pre-defined criteria of clinical deterioration (Figure 1) define the indication for appendectomy.

A physician reassesses the patient twice daily. Vital parameters including Numeric Rating Scale (NRS) pain scores are repeated every 6 hours. IV fluid administration is protocolized and weight adjusted, with no oral intake during the first 12 hours. Pain medication is prescribed according to the national guideline(29).

### **Figure 1. Flowchart non-operative management**

#### *Operative management*

IV fluids and pain medication is administered according to the same protocol as the NOT group. Antibiotic prophylaxis, operative approach and post-operative care are all according to local protocol. Post-operative antibiotics are only warranted in the event of an unexpected complex appendicitis. Discharge is allowed when the predefined discharge criteria have been met (Table 1).



## Outcome and statistical analysis

### *Primary outcome*

The primary outcome is defined as the complication rate at one year follow-up. An independent adjudication committee will review all complications and adverse events to assess their relation to the allocated treatment. The adjudication committee will categorize all complications using the Clavien-Dindo system(30). The Clavien-Dindo system was developed for reporting surgical complications. However, we expect that all possible complications of NOT can also be categorized within the same system, making a comparison between the two groups more consistent. We will report both the overall complication rate as well as subgroups based on complication severity. Any form of delayed appendectomy is not considered a complication, as we consider appendectomy necessary in patients who do not respond to initial non-operative management. This includes early failure during initial admission but also recurrent appendicitis after initial discharge. Complications as a result of a delayed appendectomy are included in the primary outcome.

Complications are defined as, but not limited to:

- Complications of antibiotic use: Allergic reaction with the need for treatment, gastrointestinal symptoms with the need for treatment, secondary infections, etc.
- Need for surgical or radiological intervention other than appendectomy but related to appendicitis
- Re-admission for an indication other than recurrent appendicitis but related to the allocated treatment
- Complications associated with appendectomy:
  - Surgical site infection: Incisional and organ-space as defined by the CDC criteria(31). We do not differentiate between superficial and deep-incisional infection
  - Stump leakage/stump appendicitis in need of antibiotic treatment or surgical/radiological intervention
  - Secondary bowel obstruction confirmed by imaging or per-operative diagnosis with the need for (non-surgical) treatment. For instance as a result of adhesions
  - Anesthesia related complications, such as pneumonia (in need of antibiotic treatment)
  - Incisional hernia. Defined as any abdominal wall gap with or without a bulge in the area of a postoperative scar perceptible or palpable by clinical examination or imaging

### *Secondary outcomes*

The rate of delayed appendectomy is reported as a secondary outcome. To evaluate the secondary endpoints follow-up will take place at 7 days, 4 weeks, 6 months and 1 year after randomization. Other secondary outcomes are listed below.

- Appendectomy related endpoints
  - Percentage of patients not having to undergo appendectomy
  - Percentage of patients with a missed diagnosis of complex appendicitis
  - Percentage of patients having to undergo appendectomy during initial antibiotic course



- 1  
2  
3 - Patients with recurrent appendicitis within 1 year (histopathologically confirmed)  
4 - Percentage of patients undergoing interval appendectomy (histopathologically no sign of  
5 recurrent appendicitis)  
6  
7  
8 • Patient related endpoints  
9 - Level of pain: assessed with by the NRS and total usage of pain medication on day 7  
10 - Health-related Quality of Life: assessed with the Child Health Questionnaire-Child Form  
11 87 (CHQ-CF87)(32), the European Quality of Life-5Dimensions-Youth questionnaire (EQ-  
12 5D-Y) (child perspective) and European Quality of life-5Dimensions-Proxy questionnaire  
13 (EQ-5D-Proxy) (parent perspective)(33)  
14 - Patient satisfaction assessed with the NET promotor score and the validated Patient  
15 Satisfaction Questionnaire (PSQ-18)(34)  
16 - Number of days absent from school, social or sport events (patient-level)  
17 - Number of days absent from work (parent-level)  
18 - Total number of extra visits to the outpatient clinic, general practitioner's office or  
19 emergency department for abdominal pain  
20 - Total length of hospital stay during the follow-up period, including admissions due to  
21 complications related to the allocated treatment. The length of initial hospital stay is  
22 included but will also be reported separately  
23  
24  
25  
26  
27  
28 • Cost related endpoints  
29 - Non-medical and indirect costs at one year follow-up: using the Medical Consumption  
30 Questionnaire (iMCQ)(35) and the Productivity Cost Questionnaire (iPCQ)(36) adapted for  
31 use in children and parents  
32 - Actual health care costs: variables gathered are, but not are limited to, number of follow-  
33 up out-patient clinic visits, number of general practitioner visits, number of emergency  
34 department visits and actual in-hospital generated costs  
35  
36  
37

### **Data analysis plan**

38  
39 The primary analysis will be done according to the intention-to-treat (ITT) principle. A per-protocol  
40 analysis will be performed as well to prevent unjust rejection of the null hypothesis, which is a risk in  
41 non-inferiority research(37). We only consider cases as a treatment arm crossover if the randomly  
42 assigned treatment is switched because of patient and/or parental preference without their being  
43 medical grounds. Therefore patients receiving an appendectomy because of clinical deterioration,  
44 abdominal complaints after discharge, or recurrent appendicitis will be not be labeled as a crossover.  
45 We will use multiple logistic and linear regression analyses for binary and continuous outcomes,  
46 respectively, to adjust for stratification factors. Differences in proportions, numbers needed to treat  
47 and absolute and relative differences in continuous outcomes will be presented with the  
48 corresponding 95% CI, except for the percentage of patients with complications within one year  
49 (primary outcome), for which a one-sided 97.5% CI limit will be given in accordance with the non-  
50 inferiority design. In a secondary analysis the information recorded during the initial hospital stay will  
51 be analyzed using multiple logistic regression analysis in order to identify potential predictive  
52 variables for NOT failure. Statistical analyses will be performed using IBM SPSS Statistics Version 22.0  
53 or higher (IBM Corp. released 2013. Armonk, NY).  
54  
55  
56  
57  
58  
59  
60

## **Ethics and dissemination.**

### ***Data collection and confidentiality***

All data is handled confidentially and access is strictly limited in accordance with the Dutch Personal Data Protection Act. All participants are assigned a unique study code, which is not based on the patient initials or birth date. The master sheet only contains the study code and patient identification information. Data is gathered through clinical observations, outpatient clinic visits, follow-up phone calls and online questionnaires. All data is collected via Castor Electronic Data Capture(25), a web-based electronic case record form, which is built, maintained and has an audit trail all according to Good Clinical Practice guidelines. All data will be stored for a period of at least 15 years.

### ***Monitoring and safety***

Reliable high quality data is deemed of the utmost importance. The Clinical Research Bureau of the VU University Medical Centre will provide external monitoring, with monitoring visits of each participating center at least once a year.

The accredited Medical Ethics Review Committee of the Academic Medical Center, Amsterdam (MERC AMC) will be informed annually. All (serious) adverse events, suspected unexpected serious adverse reactions (SUSAR) and any other significant problems are reported to the MERC using an online submission system. To further assure the safety of participants an independent Data Safety Monitoring Board (DSMB) is installed, consisting of a surgeon, a pediatrician and a statistician. They receive an overview of the primary outcome six-monthly, as well as serious adverse events (SAEs), SUSARs and the number of patients having to undergo a delayed appendectomy. An interim analysis for efficacy will not be performed. If a serious concern arises for the safety of the patients in the trial, the DSMB can recommend early termination of the study. These agreements have been documented in a DSMB charter.

### ***Ethics***

The trial will be conducted in compliance with the current version of the Declaration of Helsinki, the ICH Good Clinical Practice guidelines E6(R1) and in accordance with the Dutch Medical Research Involving Human Subjects Act (WMO). The study protocol has been approved by the MREC AMC.

### ***Withdrawal***

Subjects can withdraw from the study without explanation at any time. They will be asked their reason for withdrawal, and they will be asked for permission to use their data. In case of withdrawal the patient will be treated according to the national protocol, which would be an appendectomy. However, the surgeon in charge of care can decide otherwise in agreement with the patient and his or her family. Patients can also be withdrawn by the surgeon or the investigator for urgent medical reasons.

### ***Dissemination plan***

Dispersion of the trial results will be accomplished by publication in an international peer-reviewed scientific journal and by presentations at (international) conferences. When the results of the trial warrant changes in the standard treatment guidelines of simple appendicitis, we reckon that the widespread execution of the trial in centers throughout the Netherlands will aid in its implementation.

### *Implementation study*

To ensure optimal implementation a problem analysis will be conducted parallel to this RCT, investigating the promoting and obstructing determinants of implementation from patients', surgeons', organizational and social-political perspective. This qualitative study will include structured interviews with patients, parents, professionals and other stakeholders.

## **Discussion**

### *Strengths and limitations of this study*

This trial only includes patients with imaging-confirmed appendicitis, thus reducing the risk of including patients with other diagnoses, or those with a non-inflamed appendix. Since the implementation of a guideline in the Netherlands promoting pre-operative imaging, the pre-operative finding of non-inflamed appendices was reduced to 3.3%(38), which is low compared to for example the UK, where it is 20.6%(39). We postulate that our use of elaborate and, where possible, evidence-based patient selection methods enhances the chance of successful non-operative management. To warrant the safety of patients undergoing NOT, this protocol dictates systematic and frequent evaluation (by clinical assessment, laboratory tests and imaging studies). We expect this will identify patients not responding to the antibiotic treatment at an early stage.

The non-inferiority design does not allow for a superiority comparison for the rate of complications. The design choice was based on the argument that both treatment strategies are 100% effective in treating appendicitis, because when antibiotic treatment is not successful and when recurrent appendicitis occurs, appendectomy is performed. We postulate that the non-operatively treated patients who do not require appendectomy will have a reduction in costs, better quality of life and the avoidance of the complications associated with appendectomy. Essential for the possible acceptance of this new strategy is that it is not inferior when it comes to the risk of complications. To determine the severity of possible complications and their relation with the allocated treatment we consider the support of an independent adjudication committee a great asset.

The inclusion and exclusion criteria of this trial are mostly based on data that allow for distinguishing complex from uncomplicated appendicitis. Criteria that predict the risk of NOT failure would be more adequate. However, more data and more experience are needed to be able to develop such criteria. Data from the APAC trial will also be used to analyze predictors of failure.

### *Choice of primary outcome*

Determining the appropriate primary outcome measure in studies comparing non-operative treatment to operative treatment remains challenging. In our opinion, both strategies will be effective in treating patients with appendicitis, and therefore effectiveness or failure is not an appropriate outcome measure. Therefore we decided to use a composite outcome measure i.e. complications. Such outcome measures (morbidity and mortality) are necessary in order to start the debate whether or not non-operative treatment strategy can be integrated in clinical practice. Furthermore our goal is to compare the initial non-operative treatment strategy (reserving an appendectomy for those not responding or with recurrent appendicitis) to direct operative treatment strategy. In this view, stating that delayed appendectomy for the indication of failed antibiotic treatment or recurrent appendicitis is a complication would not be appropriate as it is integrated in the treatment strategy. Post-operative complications after delayed appendectomy are however considered as complications of the initial non-operative treatment strategy. The amount of

1  
2  
3 delayed appendectomies (for both non-responders and recurrent appendicitis) needs be included in  
4 the debate whether or not initial non-operative treatment strategy can be implemented in daily  
5 practice. It is therefore reported as a secondary outcome.  
6  
7

#### 8 *Complicated appendicitis*

9 Reluctance of some surgeons towards NOT might be explained by the fear of missing complicated  
10 appendicitis and delaying appropriate treatment. In 4.5-6.5% of the adult population treated with  
11 NOT who underwent delayed appendectomy, complicated appendicitis was found(7,10). The  
12 outcome in terms of post-appendectomy complications after delayed appendectomy (6.9%) is  
13 comparable to that for primary appendectomy (8.8%)(8).  
14  
15

#### 16 *Exclusion of patients with appendiceal faecalith*

17 We excluded patients with a suspicion of an appendiceal faecalith on pre-operative imaging studies  
18 because it is associated with a higher failure rate of NOT. In the adult population a NOT failure rate  
19 after one month of 50% was reported in the group with a faecalith vs. 14% in the group without a  
20 faecalith(20). One study only including children with appendicitis and a faecalith on imaging had to  
21 terminate inclusions early because of a NOT failure rate of 60% at a median of 4.7 months follow-up  
22 (23). Faecaliths are also associated with a higher long term recurrence risk in children, with 47.4%  
23 recurrences vs 23.7% (21).  
24  
25  
26

#### 27 *Follow-up/long-term effects*

28 Information regarding long-term results of NOT in simple appendicitis is limited and it is scarce in  
29 children. One study in children with an average follow-up of 4.3 years reported that 22 of 78 (29%)  
30 children treated with NOT experienced recurrent appendicitis(21), with a median time to recurrence  
31 of 6 months. Eight percent of all non-operatively treated children experienced recurrence after more  
32 than 1 year. The APAC trial has a follow-up of 1 year. However, all participants who have not been  
33 operated at the end of the study will be asked to participate in long-term follow-up. The long-term  
34 effects in children of losing the function of the appendix have also not yet been cleared up. The  
35 appendix might play a role in immunity and there is evidence that it is involved in preserving a  
36 healthy gut microbiome(40).  
37  
38  
39

#### 40 *Choice of antibiotic regime*

41 Most of the data on antibiotic susceptibility in appendicitis is derived from studies in adults, patients  
42 with complicated appendicitis, and mixed patient groups. There is some evidence available  
43 concerning children. A study analyzing cultures from children in Ireland with complicated  
44 appendicitis revealed that the combination therapy of amoxicillin-clavulanic acid and  
45 aminoglycosides would be appropriate in 99% of children with bacterial appendicitis-related  
46 peritonitis(41). Since antibiotic resistance rates are greatly dependent on geography, we can expect  
47 comparable or even better results in the Netherlands, considering it has the lowest rates of antibiotic  
48 use in Europe(42). Combined with a low rate of complications and extensive experience with  
49 amoxicillin-clavulanic acid and gentamicin, we consider it the most sensible regime. Further research  
50 is carried out by our research group analyzing the microbiome in simple and complicated  
51 appendicitis. Hopefully this will contribute in determining the best antibiotic regime. If non-operative  
52 treatment of appendicitis is shown to be non-inferior in this trial, further research should determine  
53 the most sensible regime and treatment duration. The first pilot RCT evaluating outpatient  
54 conservative management in a mixed group (children and adults) has already been published(43).  
55  
56  
57  
58  
59  
60

### *Antibiotic resistance*

A possible downside of NOT as opposed to surgery could be increased antibiotic resistance(44). Interestingly, a study evaluating bacterial resistance in complicated appendicitis in children showed no significant increase in resistance rates over the past 20 year(45). How this translates to bacterial resistance when simple appendicitis is treated with antibiotics, is unclear. The use of multi-drug treatment regimens has been pointed out as one of the possibilities to reduce the development of resistant bacteria(46). Our choice for amoxicillin-clavulanic acid and gentamicin prevents us from having to use so-called reserve antibiotics, unlike most of the other know studies in children, in which for instance piperacillin-tazobactam is the drug of choice. Also when the symptoms do not resolve under the chosen antibiotic regimen, appendectomy is performed; we do not switch to other antibiotics.

### *Value of histologic evaluation*

An occasionally mentioned argument(8) against non-operative treatment of appendicitis is the risk of missing other underlying causes of appendicitis, such as a carcinoid. One study repeated the abdominal ultrasound in children 1-3 months after NOT to ensure the diameter of the appendix returned to normal(21). The value of this strategy is unknown. In an analysis of 241 histopathologic appendectomy samples in children with simple appendicitis, 4 (1.6%) showed unexpected findings(47). Three parasitic infections and one Walthard cell rest were found; none of the findings required further treatment or investigation. The frequency of appendiceal carcinoid tumors in children undergoing appendectomy was 0.2%(48) and in less than 20% of these cases lymphovascular or mesenteric involvement was present. This seems a negligible risk and it is yet unclear if patients who are excluded or unresponsive to NOT are also the patients with the highest risk of having a malignancy as underlying cause.

Unique for the APAC trial is its primary outcome measure; total number of complications after 1 year. Delayed appendectomy or recurrence is not reported as the primary endpoint or as a complication. Because in our opinion there is a place for the appendectomy in non-operative management as a step-up approach for children unresponsive to antibiotic treatment. As a result eight or nine out of every 10 children with uncomplicated appendicitis would no longer have to undergo an appendectomy. Furthermore if we are able to identify specific predictive pre-operative variables, we might identify a group of patients with even better (long-term) outcomes. Finally this trial should answer the question whether the advantages of NOT are also reflected in the reported quality of life and diminished costs.

## Footnotes

**Collaborators:** The surgical, pediatric, radiology, pharmacy and emergency medicine departments of the following Dutch hospitals contribute to the execution of this trial: Academic Medical Center, Amsterdam, The Netherlands; Ziekenhuis Amstelland, Amstelveen, The Netherlands; Catharina ziekenhuis, Eindhoven, The Netherlands; Elkerliek ziekenhuis, Helmond, The Netherlands; Erasmus Medical Center, Rotterdam, The Netherlands; Flevoziekenhuis, Almere, The Netherlands; Gelre Ziekenhuis, Apeldoorn, The Netherlands; Maxima Medical Center, Veldhoven, The Netherlands; Maastricht University Medical Center, Maastricht, The Netherlands; Noordwest Ziekenhuisgroep, Alkmaar, The Netherlands; OLVG, Amsterdam, The Netherlands; Rode Kruis Ziekenhuis, Beverwijk, The Netherlands; St. Antonius ziekenhuis, Nieuwegein, The Netherlands; University medical center Radboud, Nijmegen, The Netherlands; University Medical Center, Utrecht, The Netherlands; VU University Medical Center, Amsterdam, The Netherlands; Zuyderland, Heerlen/Sittard, The Netherlands.

## Acknowledgments

Due to the multi-center and multidisciplinary nature of the trial not all supporting researchers can be mentioned by name. However we would like to acknowledge all supporting pediatricians, radiologists, pharmacists, emergency medicine physicians and pediatric nurses. And we would like to thank all of the supporting staff and other physicians that make the realization of this trial possible. We would also like to acknowledge the Dutch Foundation Children and Hospital for their advice and support in drafting the protocol.

**Authors' contributions:** All authors have contributed to the design of this trial protocol. RRG, JHvdL and HAH have initiated the project. LWEvH and RB are the chief investigators. The protocol was drafted by RRG which was refined by JHvdL, SMLT, LWEvH, RB and HAH. Statistical advice was provided by JHvdL. MK was responsible for drafting this manuscript. All authors have contributed to the manuscript and read and approved the final manuscript..

## Data sharing statement:

The trial is registered on ClinicalTrials.gov and the Dutch trial registry, both of which are open access. The study findings will be presented in a report which will be submitted for publication in a relevant peer-reviewed journal to ensure dissemination to relevant healthcare professionals. Findings may also be submitted for presentation at local meetings or conferences. The participant-level data set may be made available for meta-analyses pending relevant Medical Ethics Review Committee approval.

**Funding statement:** This work is supported by The Netherlands Organization for Health Research and Development (ZonMw) grantnumber 843002708.

**Competing interests statement:** None to declare



## Full references

1. Addiss DG, Shaffer N, Fowler BS, Tauxe R V. the Epidemiology of Appendicitis and Appendectomy in the United States. *Am J Epidemiol.* 1990 Nov;132(5):910–25.
2. Anderson JE, Bickler SW, Chang DC, Talamini MA. Examining a common disease with unknown etiology: trends in epidemiology and surgical management of appendicitis in California, 1995-2009. *World J Surg.* 2012;36(12):2787–94.
3. Livingston EH, Woodward WA, Sarosi GA, Haley RW. Disconnect between incidence of nonperforated and perforated appendicitis: implications for pathophysiology and management. *Ann Surg.* 2007 Jun;245(6):886–92.
4. Andersson RE. The natural history and traditional management of appendicitis revisited: spontaneous resolution and predominance of prehospital perforations imply that a correct diagnosis is more important than an early diagnosis. *World J Surg.* 2007 Jan;31(1):86–92.
5. Rubér M, Andersson M, Petersson BF, Olaison G, Andersson RE, Ekerfelt C. Systemic Th17-like cytokine pattern in gangrenous appendicitis but not in phlegmonous appendicitis. *Surgery.* 2010 Mar;147(3):366–72.
6. Carr NJ. The pathology of acute appendicitis. *Ann Diagn Pathol.* 2000 Feb;4(1):46–58.
7. Sallinen V, Akl EA, You JJ, Agarwal A, Shoucair S, Vandvik PO, et al. Meta-analysis of antibiotics versus appendectomy for non-perforated acute appendicitis. *Br J Surg.* 2016 Mar;
8. Harnoss JC, Zelenka I, Probst P, Grummich K, Müller-Lantzsch C, Harnoss JM, et al. Antibiotics Versus Surgical Therapy for Uncomplicated Appendicitis: Systematic Review and Meta-analysis of Controlled Trials (PROSPERO 2015: CRD42015016882). *Ann Surg.* 2016 Oct;
9. Salminen P, Paajanen H, Rautio T, Nordström P, Aarnio M, Rantanen T, et al. Antibiotic Therapy vs Appendectomy for Treatment of Uncomplicated Acute Appendicitis. *JAMA.* 2015 Jun 16;313(23):2340.
10. Rollins KE, Varadhan KK, Neal KR, Lobo DN. Antibiotics Versus Appendectomy for the Treatment of Uncomplicated Acute Appendicitis: An Updated Meta-Analysis of Randomised Controlled Trials. *World J Surg.* 2016 Oct;40(10):2305–18.
11. David E Wesson. Acute appendicitis in children: Clinical manifestations and diagnosis - UpToDate [Internet]. May 03, 2017. 2017 [cited 2017 Jun 7]. Available from: <https://www.uptodate.com/contents/acute-appendicitis-in-children-clinical-manifestations-and-diagnosis>
12. Al-Omran M, Mamdani M, McLeod RS. Epidemiologic features of acute appendicitis in Ontario, Canada. *Can J Surg. Canadian Medical Association;* 2003 Aug;46(4):263–8.
13. Georgiou R, Eaton S, Stanton MP, Pierro A, Hall NJ. Efficacy and Safety of Nonoperative Treatment for Acute Appendicitis: A Meta-analysis. *Pediatrics.* 2017 Feb;e20163003.
14. Xu J, Liu YC, Adams S, Karpelowsky J. Acute uncomplicated appendicitis study: rationale and protocol for a multicentre, prospective randomised controlled non-inferiority study to evaluate the safety and effectiveness of non-operative management in children with acute uncomplicated appendicitis. *BMJ Open.* 2016;6(12):e013299.

- 1
- 2
- 3 15. Hall NJ, Eaton S, Abbo O, Arnaud AP, Beaudin M, Brindle M, et al. Appendectomy versus non-
- 4 operative treatment for acute uncomplicated appendicitis in children: study protocol for a
- 5 multicentre, open-label, non-inferiority, randomised controlled trial. *BMJ Paediatr Open*. 2017
- 6 May;1(1):e000028.
- 7
- 8 16. Jason Fisher. Comparison of Medical and Surgical Treatment of Uncomplicated Acute
- 9 Appendicitis in Children - *ClinicalTrials.gov* [Internet]. Last updated: December 9, 2016. 2016
- 10 [cited 2017 Jun 7]. Available from: <https://clinicaltrials.gov/ct2/show/NCT02991937>
- 11
- 12 17. Peter Minneci NCH. Multi-institutional Trial of Non-operative Management of Appendicitis -
- 13 *ClinicalTrials.gov* [Internet]. Last updated: August 18, 2016. 2014 [cited 2017 Jun 7]. Available
- 14 from: <https://clinicaltrials.gov/ct2/show/NCT02271932>
- 15
- 16 18. Chan A-W, Tetzlaff JM, Altman DG, Laupacis A, Gøtzsche PC, Krleža-Jerić K, et al. SPIRIT 2013
- 17 Statement: Defining Standard Protocol Items for Clinical Trials. *Ann Intern Med* [Internet].
- 18 2013 Feb 5 [cited 2017 Jun 8];158(3):200. Available from:
- 19 <http://www.ncbi.nlm.nih.gov/pubmed/23295957>
- 20
- 21 19. Goldstein B, Giroir B, Randolph A, International Consensus Conference on Pediatric Sepsis.
- 22 International pediatric sepsis consensus conference: definitions for sepsis and organ
- 23 dysfunction in pediatrics. *Pediatr Crit Care Med*. 2005 Jan;6(1):2–8.
- 24
- 25 20. Vons C, Barry C, Maitre S, Pautrat K, Leconte M, Costaglioli B, et al. Amoxicillin plus clavulanic
- 26 acid versus appendectomy for treatment of acute uncomplicated appendicitis: an open-
- 27 label, non-inferiority, randomised controlled trial. *Lancet (London, England)*. 2011
- 28 May;377(9777):1573–9.
- 29
- 30 21. Tanaka Y, Uchida H, Kawashima H, Fujiogi M, Takazawa S, Deie K, et al. Long-term outcomes
- 31 of operative versus nonoperative treatment for uncomplicated appendicitis. *J Pediatr Surg*.
- 32 2015;50(11):1893–7.
- 33
- 34 22. Svensson JF, Patkova B, Almström M, Naji H, Hall NJ, Eaton S, et al. Nonoperative Treatment
- 35 With Antibiotics Versus Surgery for Acute Nonperforated Appendicitis in Children. *Ann Surg*.
- 36 2015 Jan;261(1):67–71.
- 37
- 38 23. Mahida JB, Lodwick DL, Nacion KM, Sulkowski JP, Leonhart KL, Cooper JN, et al. High failure
- 39 rate of nonoperative management of acute appendicitis with an appendicolith in children. *J*
- 40 *Pediatr Surg*. 2016 Jun;51(6):908–11.
- 41
- 42 24. Gorter RR, van den Boom AL, Heij HA, Kneepkens CM, Hulsker CC, Tenhagen M, et al. A
- 43 scoring system to predict the severity of appendicitis in children. *J Surg Res*. 2016;200(2):452–
- 44 9.
- 45
- 46 25. Castor Electronic Data Capture. Amsterdam, The Netherlands: Ciwit BV; 2016.
- 47
- 48 26. Xu J, Adams S, Liu YC, Karpelowsky J. Nonoperative management in children with early acute
- 49 appendicitis: A systematic review. *J Pediatr Surg*. 2017 May 11;([Epub ahead of print]).
- 50
- 51 27. Gorter RR, van der Lee JH, Cense HA, Kneepkens CM, Wijnen MH, In 't Hof KH, et al. Initial
- 52 antibiotic treatment for acute simple appendicitis in children is safe: Short-term results from a
- 53 multicenter, prospective cohort study. *Surgery*. 2015;157(5):916–23.
- 54
- 55 28. Dutch Association for Surgery. Dutch national guideline: Diagnosis and Treatment of Acute
- 56 Appendicitis. 2010.
- 57
- 58
- 59
- 60



- 1
- 2
- 3 29. Dutch Association of Pediatrics. Dutch national guideline: Pain measurement and
- 4 management of pain in children. Utrecht; 2007.
- 5
- 6 30. Clavien PA, Barkun J, de Oliveira ML, Vauthey JN, Dindo D, Schulick RD, et al. The Clavien-
- 7 Dindo classification of surgical complications: five-year experience. *Ann Surg* [Internet]. 2009
- 8 Aug [cited 2015 Jan 26];250(2):187–96. Available from:
- 9 <http://www.ncbi.nlm.nih.gov/pubmed/19638912>
- 10
- 11 31. Horan TC, Andrus M, Dudeck MA. CDC/NHSN surveillance definition of health care-associated
- 12 infection and criteria for specific types of infections in the acute care setting. *Am J Infect*
- 13 *Control*. 2008 Jun;36(5):309–32.
- 14
- 15 32. Landgraf JM, Abetz L WJ. *The CHQ User's Manual*. Boston: The Health Institute, New England
- 16 *Medical Center*; 1996.
- 17
- 18 33. Wille N, Badia X, Bonsel G, Burström K, Cavrini G, Devlin N, et al. Development of the EQ-5D-Y:
- 19 a child-friendly version of the EQ-5D. *Qual Life Res*. 2010 Aug;19(6):875–86.
- 20
- 21 34. Thayaparan AJ, Mahdi E. The Patient Satisfaction Questionnaire Short Form (PSQ-18) as an
- 22 adaptable, reliable, and validated tool for use in various settings. *Med Educ Online* [Internet].
- 23 2013 Jan 23 [cited 2017 Jun 7];18(1):21747. Available from:
- 24 <http://www.ncbi.nlm.nih.gov/pubmed/28166030>
- 25
- 26 35. Bouwmans C, Hakkaart-van Roijen L, Koopmanschap M, Krol M, Severens H BW. *Manuel:*
- 27 *iMTA Medical Cost Questionnaire (iMCQ)*. Rotterdam: iMTA, Erasmus Universiteit Rotterdam;
- 28 2013.
- 29
- 30 36. Bouwmans C, Krol M, Severens H, Koopmanschap M, Brouwer W, Hakkaart-van Roijen L. The
- 31 iMTA Productivity Cost Questionnaire: A Standardized Instrument for Measuring and Valuing
- 32 Health-Related Productivity Losses. *Value Health*. 2015 Sep;18(6):753–8.
- 33
- 34 37. Rehal S, Morris TP, Fielding K, Carpenter JR, Phillips PPJ. Non-inferiority trials: are they
- 35 inferior? A systematic review of reporting in major medical journals. *BMJ Open*. 2016
- 36 Oct;6(10):e012594.
- 37
- 38 38. van Rossem CC, Bolmers MDM, Schreinemacher MHF, van Geloven AAW, Bemelman WA.
- 39 Prospective nationwide outcome audit of surgery for suspected acute appendicitis. *Br J Surg*.
- 40 2016 Jan;103(1):144–51.
- 41
- 42 39. Collaborative. NSR. Multicentre observational study of performance variation in provision and
- 43 outcome of emergency appendicectomy. *Br J Surg*. 2013 Aug;100(9):1240–52.
- 44
- 45 40. Randal Bollinger R, Barbas AS, Bush EL, Lin SS, Parker W. Biofilms in the large bowel suggest an
- 46 apparent function of the human vermiform appendix. *J Theor Biol*. 2007 Dec;249(4):826–31.
- 47
- 48 41. Obinwa O, Casidy M, Flynn J. The microbiology of bacterial peritonitis due to appendicitis in
- 49 children. *Irish J Med Sci (1971 -)*. 2014 Dec;183(4):585–91.
- 50
- 51 42. European Centre for Disease Prevention and Control, Stockholm 2015. ECDC Summary of the
- 52 latest data on antibiotic consumption in the EU Antibiotic consumption in Europe. In 2015.
- 53
- 54 43. Talan DA, Saltzman DJ, Mower WR, Krishnadasan A, Jude CM, Amii R, et al. Antibiotics-First
- 55 Versus Surgery for Appendicitis: A US Pilot Randomized Controlled Trial Allowing Outpatient
- 56 Antibiotic Management. *Ann Emerg Med*. 2016;
- 57
- 58
- 59
- 60

- 1  
2  
3 44. Andersson RE. The role of antibiotic therapy in the management of acute appendicitis. *Curr Infect Dis Rep*. 2013 Feb;15(1):10–3.  
4  
5  
6 45. Schmitt F, Clermidi P, Dorsi M, Cocquerelle V, Gomes CF, Becmeur F. Bacterial studies of  
7 complicated appendicitis over a 20-year period and their impact on empirical antibiotic  
8 treatment. *J Pediatr Surg*. 2012 Nov;47(11):2055–62.  
9  
10 46. Hughes D, Andersson DI. Evolutionary consequences of drug resistance: shared principles  
11 across diverse targets and organisms. *Nat Rev Genet*. Nature Publishing Group, a division of  
12 Macmillan Publishers Limited. All Rights Reserved.; 2015 Aug;16(8):459–71.  
13  
14 47. Gorter RR, van Amstel P, van der Lee JH, van der Voorn P, Bakx R, Heij HA. Unexpected  
15 findings after surgery for suspected appendicitis rarely change treatment in pediatric patients;  
16 Results from a cohort study. *J Pediatr Surg* [Internet]. 2017 Mar 6 [cited 2017 Mar 24];  
17 Available from: <http://www.ncbi.nlm.nih.gov/pubmed/28302361>  
18  
19 48. Fallon SC, Hicks MJ, Carpenter JL, Vasudevan SA, Nuchtern JG, Cass DL. Management of  
20 appendiceal carcinoid tumors in children. *J Surg Res*. 2015 Oct;198(2):384–7.  
21  
22  
23  
24  
25  
26  
27  
28  
29  
30  
31  
32  
33  
34  
35  
36  
37  
38  
39  
40  
41  
42  
43  
44  
45  
46  
47  
48  
49  
50  
51  
52  
53  
54  
55  
56  
57  
58  
59  
60

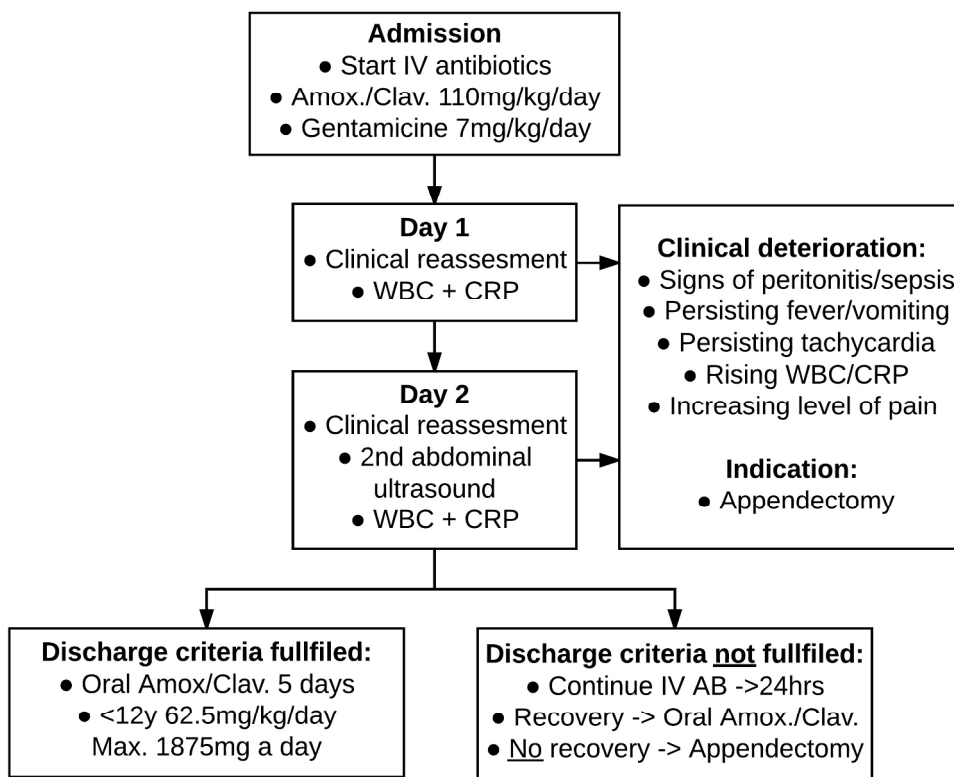

Figure 1. Flowchart non-operative management

217x178mm (300 x 300 DPI)

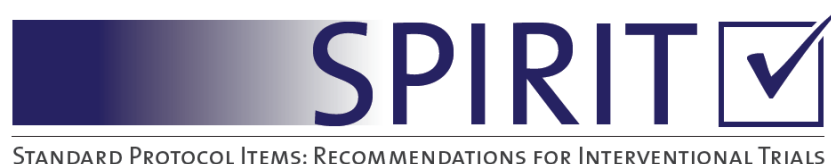

STANDARD PROTOCOL ITEMS: RECOMMENDATIONS FOR INTERVENTIONAL TRIALS

SPIRIT 2013 Checklist: Recommended items to address in a clinical trial protocol and related documents\*

| Section/item                      | Item No | Description                                                                                                                                                                                                                                                                              | Addressed on page number |
|-----------------------------------|---------|------------------------------------------------------------------------------------------------------------------------------------------------------------------------------------------------------------------------------------------------------------------------------------------|--------------------------|
| <b>Administrative information</b> |         |                                                                                                                                                                                                                                                                                          |                          |
| Title                             | 1       | Descriptive title identifying the study design, population, interventions, and, if applicable, trial acronym                                                                                                                                                                             | _____                    |
| Trial registration                | 2a      | Trial identifier and registry name. If not yet registered, name of intended registry                                                                                                                                                                                                     | _____                    |
|                                   | 2b      | All items from the World Health Organization Trial Registration Data Set                                                                                                                                                                                                                 | _____                    |
| Protocol version                  | 3       | Date and version identifier                                                                                                                                                                                                                                                              | _____                    |
| Funding                           | 4       | Sources and types of financial, material, and other support                                                                                                                                                                                                                              | _____                    |
| Roles and responsibilities        | 5a      | Names, affiliations, and roles of protocol contributors                                                                                                                                                                                                                                  | _____                    |
|                                   | 5b      | Name and contact information for the trial sponsor                                                                                                                                                                                                                                       | _____                    |
|                                   | 5c      | Role of study sponsor and funders, if any, in study design; collection, management, analysis, and interpretation of data; writing of the report; and the decision to submit the report for publication, including whether they will have ultimate authority over any of these activities | _____                    |
|                                   | 5d      | Composition, roles, and responsibilities of the coordinating centre, steering committee, endpoint adjudication committee, data management team, and other individuals or groups overseeing the trial, if applicable (see Item 21a for data monitoring committee)                         | _____                    |

1 **Introduction**

2

3 Background and 6a Description of research question and justification for undertaking the trial, including summary of relevant  
4 rationale studies (published and unpublished) examining benefits and harms for each intervention \_\_\_\_\_  
5

6 6b Explanation for choice of comparators \_\_\_\_\_  
7

8 Objectives 7 Specific objectives or hypotheses \_\_\_\_\_  
9

10 Trial design 8 Description of trial design including type of trial (eg, parallel group, crossover, factorial, single group),  
11 allocation ratio, and framework (eg, superiority, equivalence, noninferiority, exploratory) \_\_\_\_\_  
12  
13

14 **Methods: Participants, interventions, and outcomes**

15

16 Study setting 9 Description of study settings (eg, community clinic, academic hospital) and list of countries where data will  
17 be collected. Reference to where list of study sites can be obtained \_\_\_\_\_  
18

19 Eligibility criteria 10 Inclusion and exclusion criteria for participants. If applicable, eligibility criteria for study centres and  
20 individuals who will perform the interventions (eg, surgeons, psychotherapists) \_\_\_\_\_  
21

22 Interventions 11a Interventions for each group with sufficient detail to allow replication, including how and when they will be  
23 administered \_\_\_\_\_  
24

25 11b Criteria for discontinuing or modifying allocated interventions for a given trial participant (eg, drug dose  
26 change in response to harms, participant request, or improving/worsening disease) \_\_\_\_\_  
27

28 11c Strategies to improve adherence to intervention protocols, and any procedures for monitoring adherence  
29 (eg, drug tablet return, laboratory tests) \_\_\_\_\_  
30

31 11d Relevant concomitant care and interventions that are permitted or prohibited during the trial \_\_\_\_\_  
32

33 Outcomes 12 Primary, secondary, and other outcomes, including the specific measurement variable (eg, systolic blood  
34 pressure), analysis metric (eg, change from baseline, final value, time to event), method of aggregation (eg,  
35 median, proportion), and time point for each outcome. Explanation of the clinical relevance of chosen  
36 efficacy and harm outcomes is strongly recommended \_\_\_\_\_  
37

38 Participant timeline 13 Time schedule of enrolment, interventions (including any run-ins and washouts), assessments, and visits for  
39 participants. A schematic diagram is highly recommended (see Figure) \_\_\_\_\_  
40  
41  
42  
43

1 Sample size 14 Estimated number of participants needed to achieve study objectives and how it was determined, including \_\_\_\_\_  
 2 clinical and statistical assumptions supporting any sample size calculations

3  
 4 Recruitment 15 Strategies for achieving adequate participant enrolment to reach target sample size \_\_\_\_\_  
 5  
 6

### 7 **Methods: Assignment of interventions (for controlled trials)**

#### 8 Allocation:

9  
 10 Sequence 16a Method of generating the allocation sequence (eg, computer-generated random numbers), and list of any \_\_\_\_\_  
 11 generation factors for stratification. To reduce predictability of a random sequence, details of any planned restriction  
 12 (eg, blocking) should be provided in a separate document that is unavailable to those who enrol participants  
 13 or assign interventions  
 14  
 15

16 Allocation 16b Mechanism of implementing the allocation sequence (eg, central telephone; sequentially numbered, \_\_\_\_\_  
 17 concealment opaque, sealed envelopes), describing any steps to conceal the sequence until interventions are assigned  
 18 mechanism  
 19  
 20

21 Implementation 16c Who will generate the allocation sequence, who will enrol participants, and who will assign participants to \_\_\_\_\_  
 22 interventions  
 23

24 Blinding (masking) 17a Who will be blinded after assignment to interventions (eg, trial participants, care providers, outcome \_\_\_\_\_  
 25 assessors, data analysts), and how  
 26

27  
 28 17b If blinded, circumstances under which unblinding is permissible, and procedure for revealing a participant's \_\_\_\_\_  
 29 allocated intervention during the trial  
 30  
 31

### 32 **Methods: Data collection, management, and analysis**

33  
 34 Data collection 18a Plans for assessment and collection of outcome, baseline, and other trial data, including any related \_\_\_\_\_  
 35 methods processes to promote data quality (eg, duplicate measurements, training of assessors) and a description of  
 36 study instruments (eg, questionnaires, laboratory tests) along with their reliability and validity, if known.  
 37 Reference to where data collection forms can be found, if not in the protocol  
 38  
 39

40 18b Plans to promote participant retention and complete follow-up, including list of any outcome data to be \_\_\_\_\_  
 41 collected for participants who discontinue or deviate from intervention protocols  
 42  
 43  
 44

|    |                                 |     |                                                                                                              |       |
|----|---------------------------------|-----|--------------------------------------------------------------------------------------------------------------|-------|
| 1  | Data management                 | 19  | Plans for data entry, coding, security, and storage, including any related processes to promote data quality | _____ |
| 2  |                                 |     | (eg, double data entry; range checks for data values). Reference to where details of data management         |       |
| 3  |                                 |     | procedures can be found, if not in the protocol                                                              |       |
| 4  |                                 |     |                                                                                                              |       |
| 5  | Statistical methods             | 20a | Statistical methods for analysing primary and secondary outcomes. Reference to where other details of the    | _____ |
| 6  |                                 |     | statistical analysis plan can be found, if not in the protocol                                               |       |
| 7  |                                 |     |                                                                                                              |       |
| 8  |                                 | 20b | Methods for any additional analyses (eg, subgroup and adjusted analyses)                                     | _____ |
| 9  |                                 |     |                                                                                                              |       |
| 10 |                                 | 20c | Definition of analysis population relating to protocol non-adherence (eg, as randomised analysis), and any   | _____ |
| 11 |                                 |     | statistical methods to handle missing data (eg, multiple imputation)                                         |       |
| 12 |                                 |     |                                                                                                              |       |
| 13 |                                 |     |                                                                                                              |       |
| 14 |                                 |     |                                                                                                              |       |
| 15 | <b>Methods: Monitoring</b>      |     |                                                                                                              |       |
| 16 |                                 |     |                                                                                                              |       |
| 17 | Data monitoring                 | 21a | Composition of data monitoring committee (DMC); summary of its role and reporting structure; statement of    | _____ |
| 18 |                                 |     | whether it is independent from the sponsor and competing interests; and reference to where further details   |       |
| 19 |                                 |     | about its charter can be found, if not in the protocol. Alternatively, an explanation of why a DMC is not    |       |
| 20 |                                 |     | needed                                                                                                       |       |
| 21 |                                 |     |                                                                                                              |       |
| 22 |                                 | 21b | Description of any interim analyses and stopping guidelines, including who will have access to these interim | _____ |
| 23 |                                 |     | results and make the final decision to terminate the trial                                                   |       |
| 24 |                                 |     |                                                                                                              |       |
| 25 |                                 |     |                                                                                                              |       |
| 26 | Harms                           | 22  | Plans for collecting, assessing, reporting, and managing solicited and spontaneously reported adverse        | _____ |
| 27 |                                 |     | events and other unintended effects of trial interventions or trial conduct                                  |       |
| 28 |                                 |     |                                                                                                              |       |
| 29 | Auditing                        | 23  | Frequency and procedures for auditing trial conduct, if any, and whether the process will be independent     | _____ |
| 30 |                                 |     | from investigators and the sponsor                                                                           |       |
| 31 |                                 |     |                                                                                                              |       |
| 32 |                                 |     |                                                                                                              |       |
| 33 | <b>Ethics and dissemination</b> |     |                                                                                                              |       |
| 34 |                                 |     |                                                                                                              |       |
| 35 | Research ethics                 | 24  | Plans for seeking research ethics committee/institutional review board (REC/IRB) approval                    | _____ |
| 36 | approval                        |     |                                                                                                              |       |
| 37 |                                 |     |                                                                                                              |       |
| 38 | Protocol                        | 25  | Plans for communicating important protocol modifications (eg, changes to eligibility criteria, outcomes,     | _____ |
| 39 | amendments                      |     | analyses) to relevant parties (eg, investigators, REC/IRBs, trial participants, trial registries, journals,  |       |
| 40 |                                 |     | regulators)                                                                                                  |       |
| 41 |                                 |     |                                                                                                              |       |
| 42 |                                 |     |                                                                                                              |       |
| 43 |                                 |     |                                                                                                              |       |
| 44 |                                 |     |                                                                                                              |       |
| 45 |                                 |     |                                                                                                              |       |
| 46 |                                 |     |                                                                                                              |       |
| 47 |                                 |     |                                                                                                              |       |

|    |                      |     |                                                                                                                 |       |
|----|----------------------|-----|-----------------------------------------------------------------------------------------------------------------|-------|
| 1  | Consent or assent    | 26a | Who will obtain informed consent or assent from potential trial participants or authorised surrogates, and      | _____ |
| 2  |                      |     | how (see Item 32)                                                                                               |       |
| 3  |                      |     |                                                                                                                 |       |
| 4  |                      | 26b | Additional consent provisions for collection and use of participant data and biological specimens in ancillary  | _____ |
| 5  |                      |     | studies, if applicable                                                                                          |       |
| 6  |                      |     |                                                                                                                 |       |
| 7  | Confidentiality      | 27  | How personal information about potential and enrolled participants will be collected, shared, and maintained    | _____ |
| 8  |                      |     | in order to protect confidentiality before, during, and after the trial                                         |       |
| 9  |                      |     |                                                                                                                 |       |
| 10 | Declaration of       | 28  | Financial and other competing interests for principal investigators for the overall trial and each study site   | _____ |
| 11 | interests            |     |                                                                                                                 |       |
| 12 |                      |     |                                                                                                                 |       |
| 13 |                      |     |                                                                                                                 |       |
| 14 | Access to data       | 29  | Statement of who will have access to the final trial dataset, and disclosure of contractual agreements that     | _____ |
| 15 |                      |     | limit such access for investigators                                                                             |       |
| 16 |                      |     |                                                                                                                 |       |
| 17 | Ancillary and post-  | 30  | Provisions, if any, for ancillary and post-trial care, and for compensation to those who suffer harm from trial | _____ |
| 18 | trial care           |     | participation                                                                                                   |       |
| 19 |                      |     |                                                                                                                 |       |
| 20 | Dissemination policy | 31a | Plans for investigators and sponsor to communicate trial results to participants, healthcare professionals,     | _____ |
| 21 |                      |     | the public, and other relevant groups (eg, via publication, reporting in results databases, or other data       |       |
| 22 |                      |     | sharing arrangements), including any publication restrictions                                                   |       |
| 23 |                      |     |                                                                                                                 |       |
| 24 |                      |     |                                                                                                                 |       |
| 25 |                      | 31b | Authorship eligibility guidelines and any intended use of professional writers                                  | _____ |
| 26 |                      |     |                                                                                                                 |       |
| 27 |                      | 31c | Plans, if any, for granting public access to the full protocol, participant-level dataset, and statistical code | _____ |
| 28 |                      |     |                                                                                                                 |       |
| 29 |                      |     |                                                                                                                 |       |
| 30 | <b>Appendices</b>    |     |                                                                                                                 |       |
| 31 |                      |     |                                                                                                                 |       |
| 32 | Informed consent     | 32  | Model consent form and other related documentation given to participants and authorised surrogates              | _____ |
| 33 | materials            |     |                                                                                                                 |       |
| 34 |                      |     |                                                                                                                 |       |
| 35 | Biological           | 33  | Plans for collection, laboratory evaluation, and storage of biological specimens for genetic or molecular       | _____ |
| 36 | specimens            |     | analysis in the current trial and for future use in ancillary studies, if applicable                            |       |
| 37 |                      |     |                                                                                                                 |       |

38  
39 \*It is strongly recommended that this checklist be read in conjunction with the SPIRIT 2013 Explanation & Elaboration for important clarification on the items.  
40 Amendments to the protocol should be tracked and dated. The SPIRIT checklist is copyrighted by the SPIRIT Group under the Creative Commons  
41 ["Attribution-NonCommercial-NoDerivs 3.0 Unported"](https://creativecommons.org/licenses/by-nc-nd/3.0/) license.  
42  
43  
44



# BMJ Open

## Initial non-operative management of uncomplicated appendicitis in children: A protocol for a multicenter randomized controlled trial (APAC trial)

|                                 |                                                                                                                                                                                                                                                                                                                                                                                                                                                                                                                                                                                                                                                                                                                                                                                                                                                     |
|---------------------------------|-----------------------------------------------------------------------------------------------------------------------------------------------------------------------------------------------------------------------------------------------------------------------------------------------------------------------------------------------------------------------------------------------------------------------------------------------------------------------------------------------------------------------------------------------------------------------------------------------------------------------------------------------------------------------------------------------------------------------------------------------------------------------------------------------------------------------------------------------------|
| Journal:                        | <i>BMJ Open</i>                                                                                                                                                                                                                                                                                                                                                                                                                                                                                                                                                                                                                                                                                                                                                                                                                                     |
| Manuscript ID                   | bmjopen-2017-018145.R2                                                                                                                                                                                                                                                                                                                                                                                                                                                                                                                                                                                                                                                                                                                                                                                                                              |
| Article Type:                   | Protocol                                                                                                                                                                                                                                                                                                                                                                                                                                                                                                                                                                                                                                                                                                                                                                                                                                            |
| Date Submitted by the Author:   | 04-Sep-2017                                                                                                                                                                                                                                                                                                                                                                                                                                                                                                                                                                                                                                                                                                                                                                                                                                         |
| Complete List of Authors:       | Knaapen, Max; Pediatric Surgical Center of Amsterdam; Emma Children's Hospital AMC and VU University Medical Center<br>van der Lee, Johanna H.; AMC, Pediatric Clinical Research Office<br>Bakx, Roel; Pediatric Surgical Center of Amsterdam; Emma Children's Hospital AMC and VU University Medical Center<br>The, Sarah-May; Pediatric Surgical Center of Amsterdam; Emma Children's Hospital AMC and VU University Medical Center<br>Van Heurn, Ernst; Pediatric Surgical Center of Amsterdam; Emma Children's Hospital AMC and VU University Medical Center<br>Heij, Hugo; Pediatric Surgical Center of Amsterdam; Emma Children's Hospital AMC and VU University Medical Center<br>Gorter, Ramon; Pediatric Surgical Center of Amsterdam; Emma Children's Hospital AMC and VU University Medical Center<br>. , APAC collaborative study group |
| <b>Primary Subject Heading</b>: | Surgery                                                                                                                                                                                                                                                                                                                                                                                                                                                                                                                                                                                                                                                                                                                                                                                                                                             |
| Secondary Subject Heading:      | Paediatrics                                                                                                                                                                                                                                                                                                                                                                                                                                                                                                                                                                                                                                                                                                                                                                                                                                         |
| Keywords:                       | PAEDIATRICS, Paediatric gastroenterology < PAEDIATRICS, PAEDIATRIC SURGERY, Paediatric colorectal surgery < PAEDIATRIC SURGERY, SURGERY                                                                                                                                                                                                                                                                                                                                                                                                                                                                                                                                                                                                                                                                                                             |
|                                 |                                                                                                                                                                                                                                                                                                                                                                                                                                                                                                                                                                                                                                                                                                                                                                                                                                                     |

SCHOLARONE™  
Manuscripts

1  
2  
3 **Initial non-operative management of uncomplicated appendicitis in children:**  
4 **A protocol for a multicenter randomized controlled trial (APAC trial)**  
5

6  
7 Knaapen M MD<sup>1</sup>, van der Lee JH MD, PhD<sup>2</sup>, Bakx R MD, PhD<sup>1</sup>, The SML<sup>1</sup>, van Heurn LWE MD, PhD<sup>1</sup>,  
8 Heij HA MD, PhD<sup>1</sup>, Gorter RR MD, PhD<sup>1</sup>, APAC collaborative study group  
9

- 10 1. Pediatric Surgical Center of Amsterdam; Emma Children's Hospital AMC and VU University  
11 Medical Center, Amsterdam, The Netherlands  
12 2. Pediatric Clinical Research Office, Academic Medical Center, Amsterdam, The Netherlands  
13

14  
15 Address correspondence to M. Knaapen, MD

16 Address: Pediatric Surgical Center of Amsterdam; Emma Children's Hospital AMC,  
17 P.O. Box 22660, 1100 DD, Amsterdam, The Netherlands

18 Email: M.Knaapen@AMC.UvA.nl

19 Telephone: +31-20-444-2424

20 Fax: +31-20-444-2135  
21

22  
23 Funding statement: This work is supported by The Netherlands Organization for Health Research and  
24 Development (ZonMw) grantnumber 843002708.  
25

26 Competing interests statement: None to declare  
27  
28  
29  
30  
31  
32  
33  
34  
35  
36  
37  
38  
39  
40  
41  
42  
43  
44  
45  
46  
47  
48  
49  
50  
51  
52  
53  
54  
55  
56  
57  
58  
59  
60

## Abstract

### Introduction

Based on epidemiological, immunological and pathology data the idea that appendicitis is not necessarily a progressive disease is gaining ground. Two types are distinguished: simple and complicated appendicitis. Non-operative treatment (NOT) of children with simple appendicitis has been investigated in several small studies. So far it is deemed safe. However, its effectiveness and effect on quality of life (QoL) has yet to be established in a adequately powered randomized trial. In this article we provide the study protocol for the APAC trial.

### Methods and analysis

This multicenter, non-inferiority, randomized controlled trial, randomizes children aged 7 to 17 years with imaging-confirmed simple appendicitis between appendectomy and NOT. Patients are recruited in 15 hospitals. The intended sample size, based on the primary outcome, rate of complications and a non-inferiority margin of 5%, is 334 patients.

NOT consists of IV antibiotics for 48-72 hours, daily blood tests, and ultrasound follow-up. If the patient meets the pre-defined discharge criteria, antibiotic treatment is continued orally at home. Primary outcome is the rate of complications at one year follow-up. An independent adjudication committee will assess all complications and their relation to the allocated treatment. Secondary outcomes include, but are not limited to, delayed appendectomies, QoL, pain, (in)direct costs. The primary outcome will be analysed both according to the intention-to-treat and to the per-protocol principle, and is presented with a one-sided 97.5% confidence interval. We will use multiple logistic and linear regression for binary and continuous outcomes, respectively, to adjust for stratification factors.

### Ethics and dissemination.

The protocol has been approved by the Medical Ethics Review Committee of the Academic Medical Center, Amsterdam. Data monitoring is performed by an independent institute and a Data Safety Monitoring Board has been assigned. Results will be presented in peer-reviewed academic journals and at (international) conferences.

### Registration details

NCT02848820; NTR5977

## Strengths and limitations of this study

1. Meticulous selection of children with uncomplicated appendicitis using strict (evidence based) criteria, including ultrasonography.
2. Elaborate follow-up on patient, parent, hospital and economic-level.
3. An independent adjudication committee assessing all complications and their relation to the allocated treatment.
4. The non-inferiority design does not allow for a superiority comparison of the rate of complications.

## Introduction

Appendicitis is a common gastro-intestinal disease with a lifetime incidence of 7-9%(1,2). Based on the assumption that urgent removal of the appendix is necessary to avoid progressive inflammation with subsequent necrosis and perforation of the appendix, emergency appendectomy has been the standard of care since 1889. However, based on epidemiological, immunological and pathology data, several experts have stated(3–6) that appendicitis is not necessarily a progressive disease. Rather, they endorse the idea that two types of appendicitis exist: simple or uncomplicated appendicitis and complicated appendicitis. Over the years, there has been a shift towards non-operative treatment strategies for diseases which were historically treated surgically, for instance, stomach ulcers and uncomplicated diverticulitis. More recently, non-operative treatment (NOT) of acute uncomplicated appendicitis (AUA) has become the subject of investigation. This strategy consists of initial treatment with intravenous antibiotics and reserves appendectomy for non-responders and those with recurrent appendicitis.

Several randomized controlled trials (RCTs) looked at the non-operative treatment of AUA in the adult population. Results, however, vary. Most trials conclude that NOT is safe, but the reported reduction of complications varies from no significant differences(7,8) to up to 86% reduction(9). Recurrent symptoms resulting in delayed appendectomy occur in roughly 1 in 4 patients(7,8,10). These numbers are interpreted in different ways, as is illustrated by the conclusions of three recent systematic reviews, which range from indicating NOT as the preferred treatment(10) to rejecting it as a routine treatment due to insufficient knowledge about its impact on quality of life (QoL)(8).

Approximately one third of all cases of appendicitis occur under the age of 20 years. Regarding the distribution of uncomplicated and complicated appendicitis in the pediatric population, the percentage of uncomplicated appendicitis is reported to range between 68-90% in children aged 5 to 18 years(2,11). The percentage of complicated appendicitis increases with age(12), therefore reducing the amount of patients suitable for initial non-operative treatment strategy. Potential benefits of initial non-operative treatment strategy might therefore be higher for the pediatric population than for the adult population. Data in the pediatric population on the outcome of NOT for uncomplicated appendicitis is scarce and consists mainly of uncontrolled studies with small patient numbers. Recently a systematic review was published, including 10 studies (1 pilot RCT, 6 prospective cohorts and 3 retrospective cohorts) with a total of 413 children treated with NOT(13). Overall complications were reported in 5 of the 6 comparative studies. One out of 175 (0.6%) patients in the NOT group suffered complications vs. 9/239 (3.8%) patients in the primary appendectomy group. Follow-up ranged from 8 weeks to 4 years, with 82% of the NOT patients not having undergone appendectomy at follow-up completion. Recurrent appendicitis occurred in 68/396 (17%) patients; this included 19 children who were treated with a second course of antibiotics.

1  
2  
3 The evidence regarding the outcome of NOT in the pediatric population is far from sufficient. As of  
4 today, apart from the trial described in this article, four large clinical studies (three RCTs(14–16) and  
5 one prospective patient preference study(17)) are recruiting children for a comparison of primary  
6 appendectomy with NOT. In the Antibiotics versus Primary Appendectomy in Children (APAC) trial we  
7 aim to evaluate the effectiveness of the initial NOT strategy (reserving appendectomy for those not  
8 responding or with recurrent disease) compared to immediate appendectomy in terms of  
9 complications, health-related QoL and costs in children aged 7 to 17 years with AUA.  
10  
11

## 12 **Methods and analysis**

### 13 ***Study design***

14 The APAC trial is a multicenter non-inferiority randomized controlled trial. Blinding was not deemed  
15 feasible. The protocol was drafted in accordance with the SPIRIT statements (Standard Protocol  
16 Items: Recommendations for Interventional Trials)(18). This trial was registered at clinicaltrials.gov  
17 (NCT02848820) and the Dutch Trial Registry (NTR5977) prior to the start of inclusion.  
18  
19

### 20 ***Patient selection***

21 Eligible for inclusion are children 7 to 17 years old of both sexes, in whom a imaging-confirmed acute  
22 uncomplicated appendicitis is diagnosed in the emergency department of one of the participating  
23 hospitals.  
24  
25

### 26 ***Inclusion criteria***

27 Definition of AUA is based upon the following criteria.  
28  
29

- 30 • Clinical & biochemical criteria:
  - 31 - Localized tenderness in the right iliac fossa region
  - 32 - Normal/hyperactive bowel sounds
  - 33 - No guarding or palpable mass
  - 34 - Biochemical signs of infection:
    - 35 - Elevated white blood cell count (WBC)
    - 36 - Elevated C-reactive protein (CRP)
- 37 • Ultrasound criteria to confirm the diagnosis of AUA:
  - 38 - A non-compressible, painful appendix with an outer diameter > 6 mm
  - 39 - Secondary signs of inflammation, i.e. infiltration of the surrounding fat
  - 40 - Hyperemia within the appendiceal wall

41 In case the ultrasound is inconclusive, additional imaging (MRI or CAT-scan) may be obtained.  
42  
43

### 44 ***Exclusion criteria***

- 45 - Generalized peritonitis or sepsis (as defined by the international pediatric sepsis  
46 consensus conference(19))
- 47 - Findings on imaging indicative of complex appendicitis:
  - 48 - significant and/or unclear free fluid
  - 49 - signs of perforation
  - 50 - signs of intra-abdominal abscess or phlegmone

- Children with a suspicion of an appendiceal faecalith on imaging studies are excluded, because of its association with a higher risk of NOT failure(20–23).  
Ultrasound characteristics for an appendicalith are defined as a echogenic, well-defined focus within the appendix with posterior acoustic shadowing.
- Serious co-morbidity such as cardiac or pulmonary disease with significant hemodynamic consequences, immunodeficiency, malignancy or sickle cell disease
- A history of non-operatively treated appendicitis
- Suspicion of an underlying malignancy or inflammatory bowel disease
- Documented type 1 allergy to the antibiotics used
- A complex appendicitis risk score indicative of complex appendicitis

#### *Complex appendicitis risk score*

A pediatric scoring system is used(24) predicting the risk of having complex appendicitis based upon five pre-operative variables; abdominal guarding, signs of complex appendicitis on ultrasound, CRP level, temperature and days of abdominal pain. In an independent validation in a second pediatric cohort a score below 4 had a negative predictive value of 98% (95% confidence interval(CI) 88-100%). Children presenting with a score of 4 or higher will be excluded from this study because of the risk of having complicated appendicitis.

#### **Randomization**

After written informed consent from parents and child (assent from children under the age of 12) patients are randomized using the web-based randomization program Castor Electronic Data Capture version 4.10(25), stratified by center. A variable block algorithm is used to ensure concealment of allocation.

#### **Sample size calculation**

A non-inferiority design is used based upon the notion that NOT potentially has secondary advantages, for instance cost reduction and less pain(26). We hypothesize that this might also be the case for QoL. It would thus be sufficient to demonstrate that the outcome in terms of complications is not worse in the NOT group compared to the immediate appendectomy group.

In our pilot study(27) we followed the children eligible for non-operative treatment who refused participation in that study and received immediate appendectomy instead of antibiotic treatment. The frequency of post-operative complications in this group at 1-year follow-up was approximately 10% (unpublished data), meaning that 90% was successfully treated without complications in the operative group. If the difference in complication rate between NOT and operative treatment is less than 5% in favour of appendectomy, non-inferiority is assumed. We will not be testing for the superiority of NOT. Using a 1-sided alpha of 2.5% in accordance with the non-inferiority design, 150 patients per group are needed to achieve 90% power for the exclusion of a difference in favour of the usual care group of more than 5%. Although in our pilot study(27) the drop-out rate after one year was only 2%, we take into account a drop-out rate of 10%. Therefore, the number of patients to be included is 334.

#### **Study setting and feasibility**

Eligible patients are recruited in 15 hospitals across the Netherlands. This selection consists of both academic and large teaching hospitals. Inclusion started in January 2017. Based on data supplied by

the participating hospitals approximately 225 children per year will meet the inclusion criteria. In our pilot study 57% of eligible patients participated. Taking these numbers into account we expect to include 128 patients per year. We therefore expect to complete inclusion within 32 months. All of the clinical, biochemical and imaging assessments are part of the standard work-up for children suspected of having appendicitis in the Netherlands, as described in the Dutch national guideline(28).

### **Interventions**

#### *Non-operative management*

Antibiotic treatment consists of 48 hours of intravenous (IV) amoxicillin/clavulanic acid 25/2.5 mg/kg 6-hourly (maximum dose: 6000/600 mg per day) and gentamicin (7 mg/kg once daily). When the patient meets the pre-defined discharge criteria after 48 hours (Table 1) he/she is discharged with oral antibiotics. If not, IV antibiotics are continued with a maximum total duration of 72 hours. Oral treatment consists of amoxicillin/clavulanic acid 50/12.5 mg/kg in three daily doses (maximum dose: 1500/375 mg per day). Total duration of antibiotic treatment is 7 days.

| <b>Pre-defined discharge criteria (equal for both interventions)</b> |                                                                |
|----------------------------------------------------------------------|----------------------------------------------------------------|
| 1.                                                                   | Body temperature < 38.0 degrees Celsius                        |
| 2.                                                                   | NRS <4                                                         |
| 3.                                                                   | Adequate oral intake                                           |
| 4.                                                                   | Able to mobilize                                               |
| 5.                                                                   | Consent of parents for discharge                               |
| <b>Pre-defined discharge only for non-operative management</b>       |                                                                |
| 6.                                                                   | Decreased leukocytosis                                         |
| 7.                                                                   | Decreased C-reactive protein                                   |
| 8.                                                                   | No signs of complex appendicitis on 2 <sup>nd</sup> ultrasound |

**Table 1. Pre-defined discharge criteria. All criteria have to be met to allow patient to be discharged**

To optimize early detection of NOT failure, WBC and CRP are measured every 24 hours during the time of administration of IV antibiotics. After 48 hours the abdominal ultrasound is repeated to check for signs of complicated appendicitis (Figure 1).

A physician reassesses the patient twice daily. Vital parameters including Numeric Rating Scale (NRS) pain scores are repeated every 6 hours. IV fluid administration is protocolized and weight adjusted, with no oral intake during the first 12 hours. Pain medication is prescribed according to the national guideline(29).

Pre-defined criteria are in place to define the indication for appendectomy (Figure 1). In detail: a WBC count of more than 20 10E9/L or an increasing WBC count after 48 hours are criteria for clinical deterioration. As well as increasing CRP levels after 48 hours. An increasing pain level is defined as a higher NRS score than on admission despite of adequate pain medication according to protocol.

If the patient meets any of these criteria, the decision can be made to proceed with urgent appendectomy or to perform additional imaging studies. This decision is at the discretion of the surgeon in charge of the patients care and does not lie with study coordinators. However, it is



1  
2  
3 common practice for the treating surgeon to consult with the study coordinators on the appropriate  
4 course of action.  
5

6 **Figure 1. Flowchart non-operative management**  
7

8 *Operative management*

9  
10 IV fluids and pain medication is administered according to the same protocol as the NOT group.  
11 Antibiotic prophylaxis, operative approach and post-operative care are all according to local protocol.  
12 Post-operative antibiotics are only warranted in the event of an unexpected complex appendicitis.  
13 Discharge is allowed when the predefined discharge criteria have been met (Table 1).  
14  
15

16  
17 **Outcome and statistical analysis**

18 *Primary outcome*

19 The primary outcome is defined as the complication rate at one year follow-up. An independent  
20 adjudication committee will review all complications and adverse events to assess their relation to  
21 the allocated treatment. The adjudication committee will categorize all complications using the  
22 Clavien-Dindo system(30). The Clavien-Dindo system was developed for reporting surgical  
23 complications. However, we expect that all possible complications of NOT can also be categorized  
24 within the same system, making a comparison between the two groups more consistent. We will  
25 report both the overall complication rate as well as subgroups based on complication severity. Any  
26 form of delayed appendectomy is not considered a complication, as we consider appendectomy  
27 necessary in patients who do not respond to initial non-operative management. This includes early  
28 failure during initial admission but also recurrent appendicitis after initial discharge. Complications as  
29 a result of a delayed appendectomy are included in the primary outcome.  
30  
31  
32  
33

34 Complications are defined as, but not limited to:

- 35 - Complications of antibiotic use: Allergic reaction with the need for treatment, gastro-  
36 intestinal symptoms with the need for treatment, secondary infections, etc.
- 37 - Need for surgical or radiological intervention other than appendectomy but related to  
38 appendicitis
- 39 - Re-admission for an indication other than recurrent appendicitis but related to the allocated  
40 treatment
- 41 - Complications associated with appendectomy:
  - 42 - Surgical site infection: Incisional and organ-space as defined by the CDC criteria(31).  
43 We do not differentiate between superficial and deep-incisional infection
  - 44 - Stump leakage/stump appendicitis in need of antibiotic treatment or  
45 surgical/radiological intervention
  - 46 - Secondary bowel obstruction confirmed by imaging or per-operative diagnosis with  
47 the need for (non-surgical) treatment. For instance as a result of adhesions
  - 48 - Anesthesia related complications, such as pneumonia (in need of antibiotic  
49 treatment)
  - 50 - Incisional hernia. Defined as any abdominal wall gap with or without a bulge in the  
51 area of a postoperative scar perceptible or palpable by clinical examination or  
52 imaging
  - 53  
54  
55  
56  
57  
58  
59  
60

### **Secondary outcomes**

The rate of delayed appendectomy is reported as a secondary outcome. To evaluate the secondary endpoints follow-up will take place at 7 days, 4 weeks, 6 months and 1 year after randomization. Other secondary outcomes are listed below.

- Appendectomy related endpoints
  - Percentage of patients not having to undergo appendectomy
  - Percentage of patients with a missed diagnosis of complex appendicitis
  - Percentage of patients having to undergo appendectomy during initial antibiotic course
  - Patients with recurrent appendicitis within 1 year (histopathologically confirmed)
  - Percentage of patients undergoing interval appendectomy (histopathologically no sign of recurrent appendicitis)
- Patient related endpoints
  - Level of pain: assessed with by the NRS and total usage of pain medication on day 7
  - Health-related Quality of Life: assessed with the Child Health Questionnaire-Child Form 87 (CHQ-CF87)(32), the European Quality of Life-5Dimensions-Youth questionnaire (EQ-5D-Y) (child perspective) and European Quality of life-5Dimensions-Proxy questionnaire (EQ-5D-Proxy) (parent perspective)(33)
  - Patient satisfaction assessed with the NET promotor score and the validated Patient Satisfaction Questionnaire (PSQ-18)(34)
  - Number of days absent from school, social or sport events (patient-level)
  - Number of days absent from work (parent-level)
  - Total number of extra visits to the outpatient clinic, general practitioner's office or emergency department for abdominal pain
  - Total length of hospital stay during the follow-up period, including admissions due to complications related to the allocated treatment. The length of initial hospital stay is included but will also be reported separately
- Cost related endpoints
  - Non-medical and indirect costs at one year follow-up: using the Medical Consumption Questionnaire (iMCQ)(35) and the Productivity Cost Questionnaire (iPCQ)(36) adapted for use in children and parents
  - Actual health care costs: variables gathered are, but not are limited to, number of follow-up out-patient clinic visits, number of general practitioner visits, number of emergency department visits and actual in-hospital generated costs

### **Data analysis plan**

The primary analysis will be done according to the intention-to-treat (ITT) principle. A per-protocol analysis will be performed as well to prevent unjust rejection of the null hypothesis, which is a risk in non-inferiority research(37). We only consider cases as a treatment arm crossover if the randomly assigned treatment is switched because of patient and/or parental preference without their being medical grounds. Therefore patients receiving an appendectomy because of clinical deterioration, abdominal complaints after discharge, or recurrent appendicitis will be not be labeled as a crossover. We will use multiple logistic and linear regression analyses for binary and continuous outcomes,

1  
2  
3 respectively, to adjust for stratification factors. Differences in proportions, numbers needed to treat  
4 and absolute and relative differences in continuous outcomes will be presented with the  
5 corresponding 95% CI, except for the percentage of patients with complications within one year  
6 (primary outcome), for which a one-sided 97.5% CI limit will be given in accordance with the non-  
7 inferiority design. In a secondary analysis the information recorded during the initial hospital stay will  
8 be analyzed using multiple logistic regression analysis in order to identify potential predictive  
9 variables for NOT failure. Statistical analyses will be performed using IBM SPSS Statistics Version 22.0  
10 or higher (IBM Corp. released 2013. Armonk, NY).

## 14 **Ethics and dissemination.**

### 15 ***Data collection and confidentiality***

16 All data is handled confidentially and access is strictly limited in accordance with the Dutch Personal  
17 Data Protection Act. All participants are assigned a unique study code, which is not based on the  
18 patient initials or birth date. The master sheet only contains the study code and patient identification  
19 information. Data is gathered through clinical observations, outpatient clinic visits, follow-up phone  
20 calls and online questionnaires. All data is collected via Castor Electronic Data Capture(25), a web-  
21 based electronic case record form, which is built, maintained and has an audit trail all according to  
22 Good Clinical Practice guidelines. All data will be stored for a period of at least 15 years.

### 26 ***Monitoring and safety***

27 Reliable high quality data is deemed of the utmost importance. The Clinical Research Bureau of the  
28 VU University Medical Centre will provide external monitoring, with monitoring visits of each  
29 participating center at least once a year.

30 The accredited Medical Ethics Review Committee of the Academic Medical Center, Amsterdam  
31 (MERC AMC) will be informed annually. All (serious) adverse events, suspected unexpected serious  
32 adverse reactions (SUSAR) and any other significant problems are reported to the MERC using an  
33 online submission system. To further assure the safety of participants an independent Data Safety  
34 Monitoring Board (DSMB) is installed, consisting of a surgeon, a pediatrician and a statistician. They  
35 receive an overview of the primary outcome six-monthly, as well as serious adverse events (SAEs),  
36 SUSARs and the number of patients having to undergo a delayed appendectomy. An interim analysis  
37 for efficacy will not be performed. If a serious concern arises for the safety of the patients in the trial,  
38 the DSMB can recommend early termination of the study. These agreements have been documented  
39 in a DSMB charter.

### 44 ***Ethics***

45 The trial will be conducted in compliance with the current version of the Declaration of Helsinki, the  
46 ICH Good Clinical Practice guidelines E6(R1) and in accordance with the Dutch Medical Research  
47 Involving Human Subjects Act (WMO). The study protocol has been approved by the MREC AMC.

### 50 ***Withdrawal***

51 Subjects can withdraw from the study without explanation at any time. They will be asked their  
52 reason for withdrawal, and they will be asked for permission to use their data. In case of withdrawal  
53 the patient will be treated according to the national protocol, which would be an appendectomy.  
54 However, the surgeon in charge of care can decide otherwise in agreement with the patient and his  
55  
56  
57  
58  
59  
60

1  
2  
3 or her family. Patients can also be withdrawn by the surgeon or the investigator for urgent medical  
4 reasons.

### 5 6 7 **Dissemination plan**

8 Dispersion of the trial results will be accomplished by publication in an international peer-reviewed  
9 scientific journal and by presentations at (international) conferences. When the results of the trial  
10 warrant changes in the standard treatment guidelines of simple appendicitis, we reckon that the  
11 widespread execution of the trial in centers throughout the Netherlands will aid in its  
12 implementation.  
13

### 14 15 **Implementation study**

16 To ensure optimal implementation a problem analysis will be conducted parallel to this RCT,  
17 investigating the promoting and obstructing determinants of implementation from patients',  
18 surgeons', organizational and social-political perspective. This qualitative study will include  
19 structured interviews with patients, parents, professionals and other stakeholders.  
20  
21

## 22 23 **Discussion**

### 24 **Strengths and limitations of this study**

25 This trial only includes patients with imaging-confirmed appendicitis, thus reducing the risk of  
26 including patients with other diagnoses, or those with a non-inflamed appendix. Since the  
27 implementation of a guideline in the Netherlands promoting pre-operative imaging, the per-  
28 operative finding of non-inflamed appendices was reduced to 3.3%(38), which is low compared to for  
29 example the UK, where it is 20.6%(39). We postulate that our use of elaborate and, where possible,  
30 evidence-based patient selection methods enhances the chance of successful non-operative  
31 management. To warrant the safety of patients undergoing NOT, this protocol dictates systematic  
32 and frequent evaluation (by clinical assessment, laboratory tests and imaging studies). We expect  
33 this will identify patients not responding to the antibiotic treatment at an early stage.  
34  
35  
36

37 The non-inferiority design does not allow for a superiority comparison for the rate of complications.  
38 The design choice was based on the argument that both treatment strategies are 100% effective in  
39 treating appendicitis, because when antibiotic treatment is not successful and when recurrent  
40 appendicitis occurs, appendectomy is performed. We postulate that the non-operatively treated  
41 patients who do not require appendectomy will have a reduction in costs, better quality of life and  
42 the avoidance of the complications associated with appendectomy. Essential for the possible  
43 acceptance of this new strategy is that it is not inferior when it comes to the risk of complications. To  
44 determine the severity of possible complications and their relation with the allocated treatment we  
45 consider the support of an independent adjudication committee a great asset.  
46  
47  
48

49 The inclusion and exclusion criteria of this trial are mostly based on data that allow for distinguishing  
50 complex from uncomplicated appendicitis. Criteria that predict the risk of NOT failure would be more  
51 adequate. However, more data and more experience are needed to be able to develop such criteria.  
52 Data from the APAC trial will also be used to analyze predictors of failure.  
53  
54

### 55 **Choice of primary outcome**

56 Determining the appropriate primary outcome measure in studies comparing non-operative  
57 treatment to operative treatment remains challenging. In our opinion, both strategies will be  
58  
59  
60

1  
2  
3 effective in treating patients with appendicitis, and therefore effectiveness or failure is not an  
4 appropriate outcome measure. Therefore we decided to use a composite outcome measure i.e.  
5 complications. Such outcome measures (morbidity and mortality) are necessary in order to start the  
6 debate whether or not non-operative treatment strategy can be integrated in clinical practice.  
7 Furthermore our goal is to compare the initial non-operative treatment strategy (reserving an  
8 appendectomy for those not responding or with recurrent appendicitis) to direct operative  
9 treatment strategy. In this view, stating that delayed appendectomy for the indication of failed  
10 antibiotic treatment or recurrent appendicitis is a complication would not be appropriate as it is  
11 integrated in the treatment strategy. Post-operative complications after delayed appendectomy are  
12 however considered as complications of the initial non-operative treatment strategy. The amount of  
13 delayed appendectomies (for both non-responders and recurrent appendicitis) needs be included in  
14 the debate whether or not initial non-operative treatment strategy can be implemented in daily  
15 practice. It is therefore reported as a secondary outcome.  
16  
17  
18  
19

#### 20 *Complicated appendicitis*

21 Reluctance of some surgeons towards NOT might be explained by the fear of missing complicated  
22 appendicitis and delaying appropriate treatment. In 4.5-6.5% of the adult population treated with  
23 NOT who underwent delayed appendectomy, complicated appendicitis was found(7,10). The  
24 outcome in terms of post-appendectomy complications after delayed appendectomy (6.9%) is  
25 comparable to that for primary appendectomy (8.8%)(8).  
26  
27

#### 28 *Exclusion of patients with appendiceal faecalith*

29 We excluded patients with a suspicion of an appendiceal faecalith on pre-operative imaging studies  
30 because it is associated with a higher failure rate of NOT. In the adult population a NOT failure rate  
31 after one month of 50% was reported in the group with a faecalith vs. 14% in the group without a  
32 faecalith(20). One study only including children with appendicitis and a faecalith on imaging had to  
33 terminate inclusions early because of a NOT failure rate of 60% at a median of 4.7 months follow-up  
34 (23). Faecaliths are also associated with a higher long term recurrence risk in children, with 47.4%  
35 recurrences vs 23.7% (21).  
36  
37  
38  
39

#### 40 *Follow-up/long-term effects*

41 Information regarding long-term results of NOT in simple appendicitis is limited and it is scarce in  
42 children. One study in children with an average follow-up of 4.3 years reported that 22 of 78 (29%)  
43 children treated with NOT experienced recurrent appendicitis(21), with a median time to recurrence  
44 of 6 months. Eight percent of all non-operatively treated children experienced recurrence after more  
45 than 1 year. The APAC trial has a follow-up of 1 year. However, all participants who have not been  
46 operated at the end of the study will be asked to participate in long-term follow-up. The long-term  
47 effects in children of losing the function of the appendix have also not yet been cleared up. The  
48 appendix might play a role in immunity and there is evidence that it is involved in preserving a  
49 healthy gut microbiome(40).  
50  
51  
52

#### 53 *Choice of antibiotic regime*

54 Most of the data on antibiotic susceptibility in appendicitis is derived from studies in adults, patients  
55 with complicated appendicitis, and mixed patient groups. There is some evidence available  
56 concerning children. A study analyzing cultures from children in Ireland with complicated  
57 appendicitis revealed that the combination therapy of amoxicillin-clavulanic acid and  
58  
59  
60

1  
2  
3 aminoglycosides would be appropriate in 99% of children with bacterial appendicitis-related  
4 peritonitis(41). Since antibiotic resistance rates are greatly dependent on geography, we can expect  
5 comparable or even better results in the Netherlands, considering it has the lowest rates of antibiotic  
6 use in Europe(42). Combined with a low rate of complications and extensive experience with  
7 amoxicillin-clavulanic acid and gentamicin, we consider it the most sensible regime. Further research  
8 is carried out by our research group analyzing the microbiome in simple and complicated  
9 appendicitis. Hopefully this will contribute in determining the best antibiotic regime. If non-operative  
10 treatment of appendicitis is shown to be non-inferior in this trial, further research should determine  
11 the most sensible regime and treatment duration. The first pilot RCT evaluating outpatient  
12 conservative management in a mixed group (children and adults) has already been published(43).  
13  
14

#### 15 16 *Antibiotic resistance*

17 A possible downside of NOT as opposed to surgery could be increased antibiotic resistance(44).  
18 Interestingly, a study evaluating bacterial resistance in complicated appendicitis in children showed  
19 no significant increase in resistance rates over the past 20 year(45). How this translates to bacterial  
20 resistance when simple appendicitis is treated with antibiotics, is unclear. The use of multi-drug  
21 treatment regimens has been pointed out as one of the possibilities to reduce the development of  
22 resistant bacteria(46). Our choice for amoxicillin-clavulanic acid and gentamicin prevents us from  
23 having to use so-called reserve antibiotics, unlike most of the other know studies in children, in which  
24 for instance piperacillin-tazobactam is the drug of choice. Also when the symptoms do not resolve  
25 under the chosen antibiotic regimen, appendectomy is performed; we do not switch to other  
26 antibiotics.  
27  
28  
29  
30

#### 31 *Value of histologic evaluation*

32 An occasionally mentioned argument(8) against non-operative treatment of appendicitis is the risk of  
33 missing other underlying causes of appendicitis, such as a carcinoid. One study repeated the  
34 abdominal ultrasound in children 1-3 months after NOT to ensure the diameter of the appendix  
35 returned to normal(21). The value of this strategy is unknown. In an analysis of 241 histopathologic  
36 appendectomy samples in children with simple appendicitis, 4 (1.6%) showed unexpected  
37 findings(47). Three parasitic infections and one Walthard cell rest were found; none of the findings  
38 required further treatment or investigation. The frequency of appendiceal carcinoid tumors in  
39 children undergoing appendectomy was 0.2%(48) and in less than 20% of these cases lymphovascular  
40 or mesenteric involvement was present. This seems a negligible risk and it is yet unclear if patients  
41 who are excluded or unresponsive to NOT are also the patients with the highest risk of having a  
42 malignancy as underlying cause.  
43  
44  
45

46  
47 Unique for the APAC trial is its primary outcome measure; total number of complications after 1 year.  
48 Delayed appendectomy or recurrence is not reported as the primary endpoint or as a complication.  
49 Because in our opinion there is a place for the appendectomy in non-operative management as a  
50 step-up approach for children unresponsive to antibiotic treatment. As a result eight or nine out of  
51 every 10 children with uncomplicated appendicitis would no longer have to undergo an  
52 appendectomy. Furthermore if we are able to identify specific predictive pre-operative variables, we  
53 might identify a group of patients with even better (long-term) outcomes. Finally this trial should  
54 answer the question whether the advantages of NOT are also reflected in the reported quality of life  
55 and diminished costs.  
56  
57  
58  
59  
60



## Footnotes

**Collaborators:** The surgical, pediatric, radiology, pharmacy and emergency medicine departments of the following Dutch hospitals contribute to the execution of this trial: Academic Medical Center, Amsterdam, The Netherlands; Ziekenhuis Amstelland, Amstelveen, The Netherlands; Catharina ziekenhuis, Eindhoven, The Netherlands; Elkerliek ziekenhuis, Helmond, The Netherlands; Erasmus Medical Center, Rotterdam, The Netherlands; Flevoziekenhuis, Almere, The Netherlands; Gelre Ziekenhuis, Apeldoorn, The Netherlands; Maxima Medical Center, Veldhoven, The Netherlands; Maastricht University Medical Center, Maastricht, The Netherlands; Noordwest Ziekenhuisgroep, Alkmaar, The Netherlands; OLVG, Amsterdam, The Netherlands; Rode Kruis Ziekenhuis, Beverwijk, The Netherlands; St. Antonius ziekenhuis, Nieuwegein, The Netherlands; University medical center Radboud, Nijmegen, The Netherlands; University Medical Center, Utrecht, The Netherlands; VU University Medical Center, Amsterdam, The Netherlands; Zuyderland, Heerlen/Sittard, The Netherlands.

## Acknowledgments

Due to the multi-center and multidisciplinary nature of the trial not all supporting researchers can be mentioned by name. However we would like to acknowledge all supporting pediatricians, radiologists, pharmacists, emergency medicine physicians and pediatric nurses. And we would like to thank all of the supporting staff and other physicians that make the realization of this trial possible. We would also like to acknowledge the Dutch Foundation Children and Hospital for their advice and support in drafting the protocol.

**Authors' contributions:** All authors have contributed to the design of this trial protocol. RRG, JHvdL and HAH have initiated the project. LWEvH and RB are the chief investigators. The protocol was drafted by RRG which was refined by JHvdL, SMLT, LWEvH, RB and HAH. Statistical advice was provided by JHvdL. MK was responsible for drafting this manuscript. All authors have contributed to the manuscript and read and approved the final manuscript. The APAC collaborative study group consist of all local investigators who are responsible for the execution of the trial and valid data gathering. They have all read and approved the final manuscript.

## Data sharing statement:

The trial is registered on ClinicalTrials.gov and the Dutch trial registry, both of which are open access. The study findings will be presented in a report which will be submitted for publication in a relevant peer-reviewed journal to ensure dissemination to relevant healthcare professionals. Findings may also be submitted for presentation at local meetings or conferences. The participant-level data set may be made available for meta-analyses pending relevant Medical Ethics Review Committee approval.

**Funding statement:** This work is supported by The Netherlands Organization for Health Research and Development (ZonMw) grantnumber 843002708.

**Competing interests statement:** None to declare



## Full references

1. Addiss DG, Shaffer N, Fowler BS, Tauxe R V. the Epidemiology of Appendicitis and Appendectomy in the United States. *Am J Epidemiol*. 1990 Nov;132(5):910–25.
2. Anderson JE, Bickler SW, Chang DC, Talamini MA. Examining a common disease with unknown etiology: trends in epidemiology and surgical management of appendicitis in California, 1995-2009. *World J Surg*. 2012;36(12):2787–94.
3. Livingston EH, Woodward WA, Sarosi GA, Haley RW. Disconnect between incidence of nonperforated and perforated appendicitis: implications for pathophysiology and management. *Ann Surg*. 2007 Jun;245(6):886–92.
4. Andersson RE. The natural history and traditional management of appendicitis revisited: spontaneous resolution and predominance of prehospital perforations imply that a correct diagnosis is more important than an early diagnosis. *World J Surg*. 2007 Jan;31(1):86–92.
5. Rubér M, Andersson M, Petersson BF, Olaison G, Andersson RE, Ekerfelt C. Systemic Th17-like cytokine pattern in gangrenous appendicitis but not in phlegmonous appendicitis. *Surgery*. 2010 Mar;147(3):366–72.
6. Carr NJ. The pathology of acute appendicitis. *Ann Diagn Pathol*. 2000 Feb;4(1):46–58.
7. Sallinen V, Akl EA, You JJ, Agarwal A, Shoucair S, Vandvik PO, et al. Meta-analysis of antibiotics versus appendectomy for non-perforated acute appendicitis. *Br J Surg*. 2016 Mar;
8. Harnoss JC, Zelenka I, Probst P, Grummich K, Müller-Lantzsch C, Harnoss JM, et al. Antibiotics Versus Surgical Therapy for Uncomplicated Appendicitis: Systematic Review and Meta-analysis of Controlled Trials (PROSPERO 2015: CRD42015016882). *Ann Surg*. 2016 Oct;
9. Salminen P, Paajanen H, Rautio T, Nordström P, Aarnio M, Rantanen T, et al. Antibiotic Therapy vs Appendectomy for Treatment of Uncomplicated Acute Appendicitis. *JAMA*. 2015 Jun 16;313(23):2340.
10. Rollins KE, Varadhan KK, Neal KR, Lobo DN. Antibiotics Versus Appendectomy for the Treatment of Uncomplicated Acute Appendicitis: An Updated Meta-Analysis of Randomised Controlled Trials. *World J Surg*. 2016 Oct;40(10):2305–18.
11. David E Wesson. Acute appendicitis in children: Clinical manifestations and diagnosis - UpToDate [Internet]. May 03, 2017. 2017 [cited 2017 Jun 7]. Available from: <https://www.uptodate.com/contents/acute-appendicitis-in-children-clinical-manifestations-and-diagnosis>
12. Al-Omran M, Mamdani M, McLeod RS. Epidemiologic features of acute appendicitis in Ontario, Canada. *Can J Surg. Canadian Medical Association*; 2003 Aug;46(4):263–8.
13. Georgiou R, Eaton S, Stanton MP, Pierro A, Hall NJ. Efficacy and Safety of Nonoperative Treatment for Acute Appendicitis: A Meta-analysis. *Pediatrics*. 2017 Feb;e20163003.
14. Xu J, Liu YC, Adams S, Karpelowsky J. Acute uncomplicated appendicitis study: rationale and protocol for a multicentre, prospective randomised controlled non-inferiority study to evaluate the safety and effectiveness of non-operative management in children with acute uncomplicated appendicitis. *BMJ Open*. 2016;6(12):e013299.

- 1
- 2
- 3 15. Hall NJ, Eaton S, Abbo O, Arnaud AP, Beaudin M, Brindle M, et al. Appendectomy versus non-
- 4 operative treatment for acute uncomplicated appendicitis in children: study protocol for a
- 5 multicentre, open-label, non-inferiority, randomised controlled trial. *BMJ Paediatr Open*. 2017
- 6 May;1(1):e000028.
- 7
- 8 16. Jason Fisher. Comparison of Medical and Surgical Treatment of Uncomplicated Acute
- 9 Appendicitis in Children - *ClinicalTrials.gov* [Internet]. Last updated: December 9, 2016. 2016
- 10 [cited 2017 Jun 7]. Available from: <https://clinicaltrials.gov/ct2/show/NCT02991937>
- 11
- 12 17. Peter Minneci NCH. Multi-institutional Trial of Non-operative Management of Appendicitis -
- 13 *ClinicalTrials.gov* [Internet]. Last updated: August 18, 2016. 2014 [cited 2017 Jun 7]. Available
- 14 from: <https://clinicaltrials.gov/ct2/show/NCT02271932>
- 15
- 16 18. Chan A-W, Tetzlaff JM, Altman DG, Laupacis A, Gøtzsche PC, Krleža-Jerić K, et al. SPIRIT 2013
- 17 Statement: Defining Standard Protocol Items for Clinical Trials. *Ann Intern Med*. 2013 Feb
- 18 5;158(3):200.
- 19
- 20 19. Goldstein B, Giroir B, Randolph A, International Consensus Conference on Pediatric Sepsis.
- 21 International pediatric sepsis consensus conference: definitions for sepsis and organ
- 22 dysfunction in pediatrics. *Pediatr Crit Care Med*. 2005 Jan;6(1):2–8.
- 23
- 24 20. Vons C, Barry C, Maitre S, Pautrat K, Leconte M, Costaglioli B, et al. Amoxicillin plus clavulanic
- 25 acid versus appendectomy for treatment of acute uncomplicated appendicitis: an open-
- 26 label, non-inferiority, randomised controlled trial. *Lancet (London, England)*. 2011
- 27 May;377(9777):1573–9.
- 28
- 29 21. Tanaka Y, Uchida H, Kawashima H, Fujiogi M, Takazawa S, Deie K, et al. Long-term outcomes
- 30 of operative versus nonoperative treatment for uncomplicated appendicitis. *J Pediatr Surg*.
- 31 2015;50(11):1893–7.
- 32
- 33 22. Svensson JF, Patkova B, Almström M, Naji H, Hall NJ, Eaton S, et al. Nonoperative Treatment
- 34 With Antibiotics Versus Surgery for Acute Nonperforated Appendicitis in Children. *Ann Surg*.
- 35 2015 Jan;261(1):67–71.
- 36
- 37 23. Mahida JB, Lodwick DL, Nacion KM, Sulkowski JP, Leonhart KL, Cooper JN, et al. High failure
- 38 rate of nonoperative management of acute appendicitis with an appendicolith in children. *J*
- 39 *Pediatr Surg*. 2016 Jun;51(6):908–11.
- 40
- 41 24. Gorter RR, van den Boom AL, Heij HA, Kneepkens CM, Hulsker CC, Tenhagen M, et al. A
- 42 scoring system to predict the severity of appendicitis in children. *J Surg Res*. 2016;200(2):452–
- 43 9.
- 44
- 45 25. Castor Electronic Data Capture. Amsterdam, The Netherlands: Ciwit BV; 2016.
- 46
- 47 26. Xu J, Adams S, Liu YC, Karpelowsky J. Nonoperative management in children with early acute
- 48 appendicitis: A systematic review. *J Pediatr Surg*. 2017 May 11;([Epub ahead of print]).
- 49
- 50 27. Gorter RR, van der Lee JH, Cense HA, Kneepkens CM, Wijnen MH, In 't Hof KH, et al. Initial
- 51 antibiotic treatment for acute simple appendicitis in children is safe: Short-term results from a
- 52 multicenter, prospective cohort study. *Surgery*. 2015;157(5):916–23.
- 53
- 54 28. Dutch Association for Surgery. Dutch national guideline: Diagnosis and Treatment of Acute
- 55 Appendicitis. 2010.
- 56
- 57 29. Dutch Association of Pediatrics. Dutch national guideline: Pain measurement and
- 58
- 59
- 60

- management of pain in children. Utrecht; 2007.
30. Clavien PA, Barkun J, de Oliveira ML, Vauthey JN, Dindo D, Schulick RD, et al. The Clavien-Dindo classification of surgical complications: five-year experience. *Ann Surg*. 2009 Aug;250(2):187–96.
  31. Horan TC, Andrus M, Dudeck MA. CDC/NHSN surveillance definition of health care-associated infection and criteria for specific types of infections in the acute care setting. *Am J Infect Control*. 2008 Jun;36(5):309–32.
  32. Landgraf JM, Abetz L WJ. *The CHQ User's Manual*. Boston: The Health Institute, New England Medical Center; 1996.
  33. Wille N, Badia X, Bonsel G, Burström K, Cavrini G, Devlin N, et al. Development of the EQ-5D-Y: a child-friendly version of the EQ-5D. *Qual Life Res*. 2010 Aug;19(6):875–86.
  34. Thayaparan AJ, Mahdi E. The Patient Satisfaction Questionnaire Short Form (PSQ-18) as an adaptable, reliable, and validated tool for use in various settings. *Med Educ Online*. 2013 Jan 23;18(1):21747.
  35. Bouwmans C, Hakkaart-van Roijen L, Koopmanschap M, Krol M, Severens H BW. *Manuel: iMTA Medical Cost Questionnaire (iMCQ)*. Rotterdam: iMTA, Erasmus Universiteit Rotterdam; 2013.
  36. Bouwmans C, Krol M, Severens H, Koopmanschap M, Brouwer W, Hakkaart-van Roijen L. The iMTA Productivity Cost Questionnaire: A Standardized Instrument for Measuring and Valuing Health-Related Productivity Losses. *Value Health*. 2015 Sep;18(6):753–8.
  37. Rehal S, Morris TP, Fielding K, Carpenter JR, Phillips PPJ. Non-inferiority trials: are they inferior? A systematic review of reporting in major medical journals. *BMJ Open*. 2016 Oct;6(10):e012594.
  38. van Rossem CC, Bolmers MDM, Schreinemacher MHF, van Geloven AAW, Bemelman WA. Prospective nationwide outcome audit of surgery for suspected acute appendicitis. *Br J Surg*. 2016 Jan;103(1):144–51.
  39. Collaborative. NSR. Multicentre observational study of performance variation in provision and outcome of emergency appendicectomy. *Br J Surg*. 2013 Aug;100(9):1240–52.
  40. Randal Bollinger R, Barbas AS, Bush EL, Lin SS, Parker W. Biofilms in the large bowel suggest an apparent function of the human vermiform appendix. *J Theor Biol*. 2007 Dec;249(4):826–31.
  41. Obinwa O, Casidy M, Flynn J. The microbiology of bacterial peritonitis due to appendicitis in children. *Irish J Med Sci (1971 -)*. 2014 Dec;183(4):585–91.
  42. European Centre for Disease Prevention and Control, Stockholm 2015. ECDC Summary of the latest data on antibiotic consumption in the EU Antibiotic consumption in Europe. In 2015.
  43. Talan DA, Saltzman DJ, Mower WR, Krishnadasan A, Jude CM, Amii R, et al. Antibiotics-First Versus Surgery for Appendicitis: A US Pilot Randomized Controlled Trial Allowing Outpatient Antibiotic Management. *Ann Emerg Med*. 2016;
  44. Andersson RE. The role of antibiotic therapy in the management of acute appendicitis. *Curr Infect Dis Rep*. 2013 Feb;15(1):10–3.
  45. Schmitt F, Clermidi P, Dorsi M, Cocquerelle V, Gomes CF, Becmeur F. Bacterial studies of

1  
2  
3 complicated appendicitis over a 20-year period and their impact on empirical antibiotic  
4 treatment. *J Pediatr Surg*. 2012 Nov;47(11):2055–62.

- 5  
6 46. Hughes D, Andersson DI. Evolutionary consequences of drug resistance: shared principles  
7 across diverse targets and organisms. *Nat Rev Genet*. Nature Publishing Group, a division of  
8 Macmillan Publishers Limited. All Rights Reserved.; 2015 Aug;16(8):459–71.  
9  
10 47. Gorter RR, van Amstel P, van der Lee JH, van der Voorn P, Bakx R, Heij HA. Unexpected  
11 findings after surgery for suspected appendicitis rarely change treatment in pediatric patients;  
12 Results from a cohort study. *J Pediatr Surg*. 2017 Mar 6  
13  
14 48. Fallon SC, Hicks MJ, Carpenter JL, Vasudevan SA, Nuchtern JG, Cass DL. Management of  
15 appendiceal carcinoid tumors in children. *J Surg Res*. 2015 Oct;198(2):384–7.  
16  
17  
18  
19  
20  
21  
22  
23  
24  
25  
26  
27  
28  
29  
30  
31  
32  
33  
34  
35  
36  
37  
38  
39  
40  
41  
42  
43  
44  
45  
46  
47  
48  
49  
50  
51  
52  
53  
54  
55  
56  
57  
58  
59  
60



Figure 1. Flowchart non-operative management

217x178mm (300 x 300 DPI)

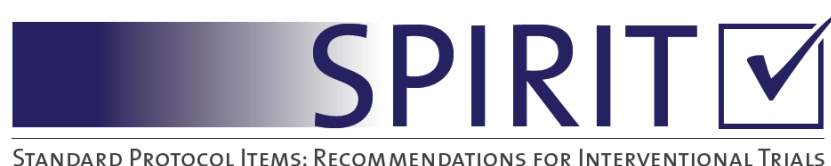

STANDARD PROTOCOL ITEMS: RECOMMENDATIONS FOR INTERVENTIONAL TRIALS

SPIRIT 2013 Checklist: Recommended items to address in a clinical trial protocol and related documents\*

| Section/item                      | Item No | Description                                                                                                                                                                                                                                                                              | Addressed on page number |
|-----------------------------------|---------|------------------------------------------------------------------------------------------------------------------------------------------------------------------------------------------------------------------------------------------------------------------------------------------|--------------------------|
| <b>Administrative information</b> |         |                                                                                                                                                                                                                                                                                          |                          |
| Title                             | 1       | Descriptive title identifying the study design, population, interventions, and, if applicable, trial acronym                                                                                                                                                                             | _____                    |
| Trial registration                | 2a      | Trial identifier and registry name. If not yet registered, name of intended registry                                                                                                                                                                                                     | _____                    |
|                                   | 2b      | All items from the World Health Organization Trial Registration Data Set                                                                                                                                                                                                                 | _____                    |
| Protocol version                  | 3       | Date and version identifier                                                                                                                                                                                                                                                              | _____                    |
| Funding                           | 4       | Sources and types of financial, material, and other support                                                                                                                                                                                                                              | _____                    |
| Roles and responsibilities        | 5a      | Names, affiliations, and roles of protocol contributors                                                                                                                                                                                                                                  | _____                    |
|                                   | 5b      | Name and contact information for the trial sponsor                                                                                                                                                                                                                                       | _____                    |
|                                   | 5c      | Role of study sponsor and funders, if any, in study design; collection, management, analysis, and interpretation of data; writing of the report; and the decision to submit the report for publication, including whether they will have ultimate authority over any of these activities | _____                    |
|                                   | 5d      | Composition, roles, and responsibilities of the coordinating centre, steering committee, endpoint adjudication committee, data management team, and other individuals or groups overseeing the trial, if applicable (see Item 21a for data monitoring committee)                         | _____                    |

1 **Introduction**

2

3 Background and 6a Description of research question and justification for undertaking the trial, including summary of relevant  
4 rationale studies (published and unpublished) examining benefits and harms for each intervention \_\_\_\_\_

5

6

7 6b Explanation for choice of comparators \_\_\_\_\_

8

9 Objectives 7 Specific objectives or hypotheses \_\_\_\_\_

10

11 Trial design 8 Description of trial design including type of trial (eg, parallel group, crossover, factorial, single group),  
12 allocation ratio, and framework (eg, superiority, equivalence, noninferiority, exploratory) \_\_\_\_\_

13

14

15 **Methods: Participants, interventions, and outcomes**

16

17 Study setting 9 Description of study settings (eg, community clinic, academic hospital) and list of countries where data will  
18 be collected. Reference to where list of study sites can be obtained \_\_\_\_\_

19

20 Eligibility criteria 10 Inclusion and exclusion criteria for participants. If applicable, eligibility criteria for study centres and  
21 individuals who will perform the interventions (eg, surgeons, psychotherapists) \_\_\_\_\_

22

23 Interventions 11a Interventions for each group with sufficient detail to allow replication, including how and when they will be  
24 administered \_\_\_\_\_

25

26 11b Criteria for discontinuing or modifying allocated interventions for a given trial participant (eg, drug dose  
27 change in response to harms, participant request, or improving/worsening disease) \_\_\_\_\_

28

29 11c Strategies to improve adherence to intervention protocols, and any procedures for monitoring adherence  
30 (eg, drug tablet return, laboratory tests) \_\_\_\_\_

31

32 11d Relevant concomitant care and interventions that are permitted or prohibited during the trial \_\_\_\_\_

33

34

35 Outcomes 12 Primary, secondary, and other outcomes, including the specific measurement variable (eg, systolic blood  
36 pressure), analysis metric (eg, change from baseline, final value, time to event), method of aggregation (eg,  
37 median, proportion), and time point for each outcome. Explanation of the clinical relevance of chosen  
38 efficacy and harm outcomes is strongly recommended \_\_\_\_\_

39

40

41 Participant timeline 13 Time schedule of enrolment, interventions (including any run-ins and washouts), assessments, and visits for  
42 participants. A schematic diagram is highly recommended (see Figure) \_\_\_\_\_

43

44

45

46

47

1 Sample size 14 Estimated number of participants needed to achieve study objectives and how it was determined, including \_\_\_\_\_  
 2 clinical and statistical assumptions supporting any sample size calculations

3  
 4 Recruitment 15 Strategies for achieving adequate participant enrolment to reach target sample size \_\_\_\_\_  
 5  
 6

### 7 **Methods: Assignment of interventions (for controlled trials)**

#### 8 Allocation:

9  
 10 Sequence 16a Method of generating the allocation sequence (eg, computer-generated random numbers), and list of any \_\_\_\_\_  
 11 generation factors for stratification. To reduce predictability of a random sequence, details of any planned restriction  
 12 (eg, blocking) should be provided in a separate document that is unavailable to those who enrol participants  
 13 or assign interventions  
 14  
 15

16 Allocation 16b Mechanism of implementing the allocation sequence (eg, central telephone; sequentially numbered, \_\_\_\_\_  
 17 concealment opaque, sealed envelopes), describing any steps to conceal the sequence until interventions are assigned  
 18 mechanism  
 19  
 20

21 Implementation 16c Who will generate the allocation sequence, who will enrol participants, and who will assign participants to \_\_\_\_\_  
 22 interventions  
 23

24 Blinding (masking) 17a Who will be blinded after assignment to interventions (eg, trial participants, care providers, outcome \_\_\_\_\_  
 25 assessors, data analysts), and how  
 26  
 27

28 17b If blinded, circumstances under which unblinding is permissible, and procedure for revealing a participant's \_\_\_\_\_  
 29 allocated intervention during the trial  
 30  
 31

### 32 **Methods: Data collection, management, and analysis**

33  
 34 Data collection 18a Plans for assessment and collection of outcome, baseline, and other trial data, including any related \_\_\_\_\_  
 35 methods processes to promote data quality (eg, duplicate measurements, training of assessors) and a description of  
 36 study instruments (eg, questionnaires, laboratory tests) along with their reliability and validity, if known.  
 37 Reference to where data collection forms can be found, if not in the protocol  
 38  
 39

40 18b Plans to promote participant retention and complete follow-up, including list of any outcome data to be \_\_\_\_\_  
 41 collected for participants who discontinue or deviate from intervention protocols  
 42  
 43  
 44



|    |                                 |     |                                                                                                              |       |
|----|---------------------------------|-----|--------------------------------------------------------------------------------------------------------------|-------|
| 1  | Data management                 | 19  | Plans for data entry, coding, security, and storage, including any related processes to promote data quality | _____ |
| 2  |                                 |     | (eg, double data entry; range checks for data values). Reference to where details of data management         |       |
| 3  |                                 |     | procedures can be found, if not in the protocol                                                              |       |
| 4  |                                 |     |                                                                                                              |       |
| 5  | Statistical methods             | 20a | Statistical methods for analysing primary and secondary outcomes. Reference to where other details of the    | _____ |
| 6  |                                 |     | statistical analysis plan can be found, if not in the protocol                                               |       |
| 7  |                                 |     |                                                                                                              |       |
| 8  |                                 | 20b | Methods for any additional analyses (eg, subgroup and adjusted analyses)                                     | _____ |
| 9  |                                 |     |                                                                                                              |       |
| 10 |                                 | 20c | Definition of analysis population relating to protocol non-adherence (eg, as randomised analysis), and any   | _____ |
| 11 |                                 |     | statistical methods to handle missing data (eg, multiple imputation)                                         |       |
| 12 |                                 |     |                                                                                                              |       |
| 13 |                                 |     |                                                                                                              |       |
| 14 |                                 |     |                                                                                                              |       |
| 15 | <b>Methods: Monitoring</b>      |     |                                                                                                              |       |
| 16 |                                 |     |                                                                                                              |       |
| 17 | Data monitoring                 | 21a | Composition of data monitoring committee (DMC); summary of its role and reporting structure; statement of    | _____ |
| 18 |                                 |     | whether it is independent from the sponsor and competing interests; and reference to where further details   |       |
| 19 |                                 |     | about its charter can be found, if not in the protocol. Alternatively, an explanation of why a DMC is not    |       |
| 20 |                                 |     | needed                                                                                                       |       |
| 21 |                                 |     |                                                                                                              |       |
| 22 |                                 | 21b | Description of any interim analyses and stopping guidelines, including who will have access to these interim | _____ |
| 23 |                                 |     | results and make the final decision to terminate the trial                                                   |       |
| 24 |                                 |     |                                                                                                              |       |
| 25 |                                 |     |                                                                                                              |       |
| 26 | Harms                           | 22  | Plans for collecting, assessing, reporting, and managing solicited and spontaneously reported adverse        | _____ |
| 27 |                                 |     | events and other unintended effects of trial interventions or trial conduct                                  |       |
| 28 |                                 |     |                                                                                                              |       |
| 29 | Auditing                        | 23  | Frequency and procedures for auditing trial conduct, if any, and whether the process will be independent     | _____ |
| 30 |                                 |     | from investigators and the sponsor                                                                           |       |
| 31 |                                 |     |                                                                                                              |       |
| 32 |                                 |     |                                                                                                              |       |
| 33 | <b>Ethics and dissemination</b> |     |                                                                                                              |       |
| 34 |                                 |     |                                                                                                              |       |
| 35 | Research ethics                 | 24  | Plans for seeking research ethics committee/institutional review board (REC/IRB) approval                    | _____ |
| 36 | approval                        |     |                                                                                                              |       |
| 37 |                                 |     |                                                                                                              |       |
| 38 | Protocol                        | 25  | Plans for communicating important protocol modifications (eg, changes to eligibility criteria, outcomes,     | _____ |
| 39 | amendments                      |     | analyses) to relevant parties (eg, investigators, REC/IRBs, trial participants, trial registries, journals,  |       |
| 40 |                                 |     | regulators)                                                                                                  |       |
| 41 |                                 |     |                                                                                                              |       |
| 42 |                                 |     |                                                                                                              |       |
| 43 |                                 |     |                                                                                                              |       |
| 44 |                                 |     |                                                                                                              |       |
| 45 |                                 |     |                                                                                                              |       |
| 46 |                                 |     |                                                                                                              |       |
| 47 |                                 |     |                                                                                                              |       |

|    |                      |     |                                                                                                                 |       |
|----|----------------------|-----|-----------------------------------------------------------------------------------------------------------------|-------|
| 1  | Consent or assent    | 26a | Who will obtain informed consent or assent from potential trial participants or authorised surrogates, and      | _____ |
| 2  |                      |     | how (see Item 32)                                                                                               |       |
| 3  |                      |     |                                                                                                                 |       |
| 4  |                      | 26b | Additional consent provisions for collection and use of participant data and biological specimens in ancillary  | _____ |
| 5  |                      |     | studies, if applicable                                                                                          |       |
| 6  |                      |     |                                                                                                                 |       |
| 7  | Confidentiality      | 27  | How personal information about potential and enrolled participants will be collected, shared, and maintained    | _____ |
| 8  |                      |     | in order to protect confidentiality before, during, and after the trial                                         |       |
| 9  |                      |     |                                                                                                                 |       |
| 10 | Declaration of       | 28  | Financial and other competing interests for principal investigators for the overall trial and each study site   | _____ |
| 11 | interests            |     |                                                                                                                 |       |
| 12 |                      |     |                                                                                                                 |       |
| 13 |                      |     |                                                                                                                 |       |
| 14 | Access to data       | 29  | Statement of who will have access to the final trial dataset, and disclosure of contractual agreements that     | _____ |
| 15 |                      |     | limit such access for investigators                                                                             |       |
| 16 |                      |     |                                                                                                                 |       |
| 17 | Ancillary and post-  | 30  | Provisions, if any, for ancillary and post-trial care, and for compensation to those who suffer harm from trial | _____ |
| 18 | trial care           |     | participation                                                                                                   |       |
| 19 |                      |     |                                                                                                                 |       |
| 20 | Dissemination policy | 31a | Plans for investigators and sponsor to communicate trial results to participants, healthcare professionals,     | _____ |
| 21 |                      |     | the public, and other relevant groups (eg, via publication, reporting in results databases, or other data       |       |
| 22 |                      |     | sharing arrangements), including any publication restrictions                                                   |       |
| 23 |                      |     |                                                                                                                 |       |
| 24 |                      |     |                                                                                                                 |       |
| 25 |                      | 31b | Authorship eligibility guidelines and any intended use of professional writers                                  | _____ |
| 26 |                      |     |                                                                                                                 |       |
| 27 |                      | 31c | Plans, if any, for granting public access to the full protocol, participant-level dataset, and statistical code | _____ |
| 28 |                      |     |                                                                                                                 |       |
| 29 |                      |     |                                                                                                                 |       |
| 30 | <b>Appendices</b>    |     |                                                                                                                 |       |
| 31 |                      |     |                                                                                                                 |       |
| 32 | Informed consent     | 32  | Model consent form and other related documentation given to participants and authorised surrogates              | _____ |
| 33 | materials            |     |                                                                                                                 |       |
| 34 |                      |     |                                                                                                                 |       |
| 35 | Biological           | 33  | Plans for collection, laboratory evaluation, and storage of biological specimens for genetic or molecular       | _____ |
| 36 | specimens            |     | analysis in the current trial and for future use in ancillary studies, if applicable                            |       |
| 37 |                      |     |                                                                                                                 |       |

38  
39 \*It is strongly recommended that this checklist be read in conjunction with the SPIRIT 2013 Explanation & Elaboration for important clarification on the items.  
40 Amendments to the protocol should be tracked and dated. The SPIRIT checklist is copyrighted by the SPIRIT Group under the Creative Commons  
41 "[Attribution-NonCommercial-NoDerivs 3.0 Unported](https://creativecommons.org/licenses/by-nc-nd/3.0/)" license.  
42  
43  
44
